1  
2  
3  
4  
5  
6  
7  
8  
9  
10  
11  
12  
13  
14  
15  
16  
17  
18  
19  
20  
21  
22  
23  
24

# Piezo1 is required for outflow tract and aortic valve development.

(Piezo1 and outflow tract/aortic valve development)

*†Adèle Faucherre<sup>1</sup>, †Hamid Moha ou Maati<sup>1</sup>, Nathalie Nasr<sup>1</sup>, Amélie Pinard<sup>2</sup>, Alexis Theron<sup>2,3</sup>, Gaëlle Odelin<sup>2</sup>, Jean-Pierre Desvignes<sup>2</sup>, David Salgado<sup>2</sup>, Gwenaëlle Collod-Bérout<sup>2</sup>, Jean-François Avierinos<sup>2,4</sup>, Guillaume Lebon<sup>1</sup>, \*Stéphane Zaffran<sup>2</sup>, \*Chris Jopling<sup>1</sup>*

<sup>1</sup> IGF, CNRS, INSERM, Univ. Montpellier, LabEx ICST, F-34094 Montpellier, France

<sup>2</sup>Aix Marseille Univ, INSERM, MMG UMR1251, 13005 Marseille, France.

<sup>3</sup>Service de Chirurgie Cardiaque, AP-HM, Hôpital de la Timone, 13005, Marseille, France.

<sup>4</sup>Service de Cardiologie, AP-HM, Hôpital de la Timone, 13005, Marseille, France.

Corresponding authors-

Chris Jopling, PhD, Email: [chris.jopling@igf.cnrs.fr](mailto:chris.jopling@igf.cnrs.fr)

Stephane Zaffran PhD, Email: [stephane.zaffran@univ-amu.fr](mailto:stephane.zaffran@univ-amu.fr)

<sup>†</sup> Co-first authors.

\*Co-corresponding authors.

Original article-7101 words

25 **Abstract**

26 **Aims-** During embryogenesis, the onset of circulatory blood flow generates a variety of  
27 hemodynamic forces which reciprocally induce changes in cardiovascular development and  
28 performance. It has been known for some time that these forces can be detected by as yet  
29 unknown mechanosensory systems which in turn promote cardiogenic events such as outflow  
30 tract and aortic valve development. PIEZO1 is a mechanosensitive ion channel present in  
31 endothelial cells where it serves to detect hemodynamic forces making it an ideal candidate to  
32 play a role during cardiac development. We sought to determine whether PIEZO1 is required  
33 for outflow tract and aortic valve development.

34

35 **Methods and results-**By analysing heart development in zebrafish we have determined that  
36 *piezo1* is expressed in the developing outflow tract where it serves to detect hemodynamic  
37 forces. In particular, we have found that mechanical forces generated during the cardiac cycle  
38 activate Piezo1 which triggers nitric oxide to be released in the outflow tract. Consequently,  
39 disrupting Piezo1 signalling leads to defective outflow tract and aortic valve development and  
40 indicates this gene may be involved in the etiology of congenital heart diseases. Based on these  
41 findings, we analysed genomic data generated from a cohort of bicuspid aortic valve patients  
42 and identified 3 probands who each harboured a novel variant in *PIEZO1*. Subsequent *in vitro*  
43 and *in vivo* assays indicates that these variants behave as dominant negatives leading to an  
44 inhibition of normal PIEZO1 mechanosensory activity and defective aortic valve development.

45

46 **Conclusion-** These data indicate that the mechanosensitive ion channel *piezo1* is required for  
47 OFT and aortic valve development and, furthermore, dominant negative variants of *PIEZO1*  
48 appear to be associated with BAV in humans.

49

## 50 **Introduction**

51           In many species, the onset of circulation precedes the role it will play later in life as an  
52 oxygen and nutrient delivery system<sup>1</sup>. As the primitive heart initiates circulation, the forces  
53 generated by the blood flow are detected by mechanosensory systems present in the  
54 endothelium which lines both the heart and vasculature<sup>2</sup>. These extracellular forces are  
55 subsequently converted into intracellular signals which can trigger a variety of cellular  
56 responses<sup>3</sup>. Many lines of evidence suggest that the hemodynamic forces generated by the  
57 circulatory system act as epigenetic cues to drive developmental processes such as  
58 cardiogenesis and valvulogenesis forward<sup>4,5</sup>. Although a number of mechanosensory systems  
59 with the potential to sense circulatory hemodynamics have been identified, our knowledge of  
60 how the endothelium detects mechanical stimuli is far from complete<sup>2,6</sup>. PIEZO1 is a  
61 mechanosensitive ion channel present in the cell membrane. When the cell membrane is  
62 stretched, this opens the channel and allows an influx of cations<sup>7</sup>. Recently, PIEZO1 has been  
63 shown to confer mechanosensitivity to endothelial cells allowing them to detect hemodynamic  
64 shear stress and subsequently align themselves in the correct orientation during vasculogenesis<sup>8</sup>.  
65 <sup>9</sup>. Furthermore, deleterious mutations in *PIEZO1* are associated with lymphedema in humans  
66 which is caused by defective lymphatic valve development<sup>10</sup>.

67           The OFT is a transient structure which is extensively remodeled during development  
68 and will give rise to a variety of cardiovascular structures including the aortic and pulmonary  
69 valves. Although it is well established that hemodynamic blood flow plays a role in OFT  
70 development and the formation of the aortic valves<sup>11</sup>, the mechanosensors that detect these  
71 forces have remained elusive. However, because of its role in sensing shear stress in the  
72 vasculature, *PIEZO1* makes a promising candidate for detecting similar forces in the OFT.

73           Here we report that disrupting Piezo1 signalling in zebrafish leads to defective  
74 development of the OFT and aortic valves. Based on these findings we have been able to

75 identify 3 independent predicted pathogenic *PIEZO1* variants in patients with bicuspid aortic  
76 valve disease (BAV). Furthermore, *in vitro* electrophysiological analysis indicates that all  
77 variants are dominant negatives which significantly inhibit wild type PIEZO1 activity after  
78 stimulation.

79

## 80 **Methods**

### 81 **Zebrafish strains and husbandry.**

82 Zebrafish were maintained under standardized conditions and experiments were conducted in  
83 accordance with local approval (APAFIS#4054-2016021116464098 v5) and the European  
84 Communities council directive 2010/63/EU. Embryos were staged as described <sup>9</sup>. The  
85 *Tg(fli1a:GFP)y1Tg* was provided by the CMR[B] *Centro de Medicina Regenerativa de Barcelona*.  
86 *The double transgenic line Tg(fli1a:GFP)y1;Tg(cmlc2a:RFP)* was generated in house. All larvae  
87 were euthanised by administration of excess anaesthetic (Tricaine).

88

### 89 **Aortic valve imaging**

90 One day prior imaging, larvae were incubated in 0.2  $\mu$ M BODIPY-FL Ceramide (Invitrogen  
91 D3521) in Embryo medium + PTU (0.003% 1-phenyl-2-thiourea). Larvae were then  
92 anesthetized with Tricaine (0.16g/L) and mounted in low melting agarose. Imaging was  
93 performed with a Zeiss LSM710 two-photon microscope coupled to a Ti:sapphire laser  
94 (Spectra-Physics, Santa Clara, CA, USA) and a water immersion 25 $\times$  objective.

95

### 96 **Electrophysiology**

97 All electrophysiological experiments were performed after 2-6 days of culture for transfected  
98 HEK-293T cells seeded at a density of 20 000 cells/35mm dish and after 2-8 hours of culture  
99 of freshly dissociated embryonic zebrafish endothelial cells. Dishes were placed on an inverted

100 microscope (DIAPHOT 300, Nikon). Recordings were performed in inside out or cell attached  
101 configuration for the patch clamp technique. PIEZO1 currents were elicited by a negative  
102 pressure step from 0 to -80mmHg with -10mmHg step increments at -80mV potential.  
103 Stimulation protocols and data acquisition were carried out using a PC (Hewlett Packard) with  
104 commercial software and hardware (pClamp 10.4) (supplemental information).

105

## 106 **Exome sequencing**

107 The exonic sequences were captured with the Agilent Sure Select All Exon v4 kit (Agilent,  
108 Santa Clara, CA, USA) and sequencing was performed on an Illumina HiSeq2000 sequencing  
109 apparatus (Illumina, San Diego, CA, USA). Raw Exome sequencing data were aligned against  
110 the human reference genome hs37decoy5 and duplicated reads were identified using the SNAP  
111 alignment tool version 1.0beta23. For detailed information regarding coverage etc, see  
112 (Suppl.table.2). GATK 3.4 was used to perform local indel realignment, score base recalibration  
113 and variant calling with the Haplotype Caller. Variations were then selected based on quality  
114 criteria using the Variant Filtration module from GATK. Variant annotation (ANNOVAR) and  
115 prioritization was performed with the VarAFT software (<http://varaft.eu>). Prioritization of the  
116 filtered-in variants was based on expression in aortic valve according to RNA-seq expression  
117 data. Patient recruitment was approved by the Comité de Protection des Patients (13.061).

118

## 119 **Results**

### 120 **Identifying the zebrafish endothelial *PIEZO1* ortholog**

121 Previous research has identified a zebrafish *PIEZO1* ortholog that does not appear to be  
122 expressed in endothelial cells<sup>12</sup>. We have subsequently identified a second *PIEZO1* ortholog,  
123 *piezo1b* (Pz1b). At 24 hours post fertilization (hpf), we could detect a weak Pz1b signal in the  
124 developing heart tube (Suppl.fig.1.A). By 48hpf a strong expression of Pz1b appeared in the

125 AV canal and OFT (Suppl.fig.1.B). By 4 days post fertilization (dpf) we were able to observe  
126 a strong expression of Pz1b in the OFT and vasculature (Fig.1.A,B and suppl.fig.1.C).  
127 Furthermore, we were also able to co-localise Pz1b with GFP labelled endothelial cells in the  
128 OFT (Fig.1.C-E). These results indicate that Pz1b is expressed in endothelial cells during  
129 zebrafish development, similar to its mammalian counterpart<sup>9</sup>.  
130 We next sought to determine whether Pz1b is a functional mechanosensitive ion channel in the  
131 developing zebrafish endothelium. To achieve this, we performed electrophysiological analysis  
132 of cultured zebrafish endothelial cells subjected to mechanical stimulation (Fig.1.F,G).  
133 Furthermore, we found that knockdown of Pz1b abolishes mechanically induced currents which  
134 was not the case when we targeted *piezo2*<sup>13</sup> (Fig.1.F,G). As an additional control, we performed  
135 the same electrophysiological analysis on WT endothelial cells treated with the PIEZO channel  
136 inhibitory peptide GsMTx4<sup>14</sup> and also observed a reduction in the amplitude of mechanically  
137 induced currents (Fig.1.F,G). These data indicate that Pz1b is a functional mechanosensitive  
138 ion channel present in the endothelial cells of developing zebrafish embryos.

139

#### 140 ***Piezo1b* is involved in cardiovascular development**

141 Knockdown of Pz1b produced a phenotype characterized by defective cardiogenesis and  
142 associated oedema at 72hpf (Suppl.fig.2. A-D' and suppl.fig.3.G-H'). Although we ensured the  
143 specificity of the observed phenotype to the knockdown of Pz1b by employing two different  
144 morpholinos targeting the same gene, we also analysed mRNA splicing, morpholino synergy  
145 and generated a CRISPR/Cas9 Pz1b knockout (Suppl.information and suppl.figs.S3 and S4).  
146 We next sought to rescue the Pz1b morphant phenotype using mouse *piezo1* mRNA (mPz1)  
147 which is not targeted by the Pz1b-MO1. In this manner, we found that co-injection of Pz1b-  
148 MO1 with 20pg of mPz1 RNA could rescue the cardiac defects observed in Pz1b morphants  
149 (Suppl.fig.3.C-F). Analysis of a number of physiological parameters indicates that Pz1b

150 morphants exhibit a decreased cardiac output along with blood regurgitation through the AV  
151 canal (Suppl.fig.2.E-I and suppl.information and suppl.fig.S6 and movies S1,2). Taken together  
152 these data indicate that loss of Pz1b results in defective cardiac development.

153

#### 154 ***Piezo1b* is required for OFT development**

155 To determine whether OFT development has been affected, we analysed this structure in WT  
156 and Pz1b morphants. At 48hpf, we could not detect any discernible differences between WT  
157 and Pz1b morphant embryos (Suppl.fig.2.J,K). However, by 72hpf, the WT OFT had developed  
158 into a “pear shaped” structure which was noticeably wider at the interface with the myocardium  
159 when compared to the Pz1b morphant OFT (Suppl.fig.2.L-P). Furthermore we were able to  
160 rescue this defect by co-injecting mouse *piezo1* RNA (suppl.fig.S3.Q,R).

161 Because the OFT is directly adjacent to the ventricle, it is most likely subjected to some of the  
162 most extreme hemodynamic forces which in turn could be detected by Pz1b to subsequently  
163 initiate the further development of this structure. To test this premise we analysed the dynamics  
164 of OFT in zebrafish larvae using confocal microscopy. At 48hpf we were able to observe the  
165 OFT stretch and relax during the cardiac cycle. At the end of systole, the OFT achieved a  
166 maximum peak inside diameter of  $16.87\mu\text{m}$  ( $\pm 0.24$  SEM) (Suppl.fig.2.Q-S and movie S3).  
167 We also made similar measurements of the dorsal aorta as a comparison and found that its  
168 diameter increased by only  $0.72\mu\text{m}$  ( $\pm 0.20$  SEM) during systole (Fig.5.S and movie S4). This  
169 indicates that indeed hemodynamic forces produce a strong dynamic response in the OFT  
170 endothelium in comparison to other regions of the vasculature.

171

#### 172 ***Piezo1b* is required for aortic valve development**

173 During cardiac development, the aortic valves will form in the OFT, a process reliant on  
174 hemodynamic forces. Based on this notion we analysed the developing aortic valves to

175 determine whether Pz1b is involved in this process. To achieve this we labelled 7dpf larvae  
176 with BODIPY and imaged them using 2 photon microscopy, a technique which has previously  
177 been employed to analyse the development of the atrioventricular valves in zebrafish<sup>15</sup>. Our  
178 analysis of WT larvae indicates that at this time point two defined leaflets have formed which  
179 function effectively to regulate the flow of blood as it is ejected from the ventricle (Fig.2A and  
180 Movie.S5). In comparison, the valves in Pz1b morphants are highly dysmorphic and appear to  
181 be enlarged and misshapen (Fig.2.B and Movie.S6). Previous research in mammals and humans  
182 has determined that *NOTCH1* is required for aortic valve development and mutations in this  
183 gene are associated with BAV<sup>16</sup>. In this regard we next analysed the aortic valves in *notch1b*  
184 KO zebrafish larvae. Similar to Pz1b morphants, the aortic valves in *notch1b* mutants are also  
185 highly dysmorphic compared to WT controls (Fig.2.C and Movie.S7). The *epidermal growth*  
186 *factor receptor* (EGFR) gene has also been implicated in the etiology of BAV<sup>17</sup>, furthermore  
187 previous research in zebrafish has indicated that chemical inhibition of EGFR using either  
188 PKI166 or AG1478 results in defective OFT development<sup>18</sup>. Based on this we treated zebrafish  
189 embryos with either inhibitor for 7 days and again assessed aortic valve development. As with  
190 Pz1b morphants and *notch1b* mutants, inhibition of EGFR results in dysmorphic aortic valves  
191 (Fig.2.D,E). Lastly, *Endothelial Nitric Oxide Synthase* (eNOS) has also been linked to BAV in  
192 mice<sup>17</sup>, while treatment of zebrafish embryos with the NOS inhibitor 2-trifluoromethylphenyl  
193 imidazole (TRIM) results in defective cardiac development<sup>19</sup>. Therefore, we also treated  
194 zebrafish larvae with TRIM and analysed their aortic valves as before and found that TRIM  
195 treated larvae also display defective aortic valves (Fig.2.F). Taken together these data indicate  
196 that loss of Pz1b results in defective aortic valve development and, furthermore, the resulting  
197 phenotype is reminiscent of the valve phenotype caused by disrupting BAV associated  
198 genes/proteins in zebrafish.

199



200 ***Piezo1b* regulates nitric oxide production and extracellular matrix composition in the**  
201 **outflow tract**

202 During embryonic zebrafish development, there is a pronounced and sustained release of nitric  
203 oxide (NO) in the OFT, coincident with increasing hemodynamic load<sup>20, 21</sup>. To determine  
204 whether Pz1b is involved in NO release, we utilized a DAF-FM DA assay to detect the NO  
205 signal produced in the OFT<sup>20, 21</sup>. Analysis of control 72hpf embryos indicates a clear NO signal  
206 in the developing OFT (Suppl.fig.5.A-B' and 5.I). Conversely, the NO signal was noticeably  
207 absent in the OFT of Pz1b morphants (Suppl.fig.5.C-C' and 5.I). We next assessed whether  
208 ablation of erythrocytes with phenylhydrazine (PHZ) to reduce shear stress, or reducing the  
209 heart rate substantially (108.3bpm +/-2.1SEM, n=10) by treatment with 10mM 2,3-butanedione  
210 monoxime (BDM)<sup>22, 23</sup>, also had the same effect on NO production in the OFT (Suppl.fig.5.D-  
211 E' and 5.I). Although each of these conditions leads to a significant reduction in NO signal,  
212 only complete cessation of the heart beat using 15mM BDM abolishes the NO signal  
213 (Suppl.fig.5.F-F' and 5.I). To further confirm these results we also analysed NO production in  
214 *troponin t2* (*tnnt2*) morphants which lack any discernible heartbeat<sup>24</sup>. Similarly to arresting the  
215 heart using BDM treatment, we also found that the loss of heart beat observed in *tnnt2*  
216 morphants also significantly reduces the production of NO in the OFT (Suppl.fig.5.G-G' and  
217 5.I). Lastly, we also treated WT 72hpf embryos with the PIEZO1 inhibitor, GsMTx4, for 4  
218 hours and found that this significantly reduced the amount of NO produced in the OFT  
219 (Suppl.fig.5.H-H' and 5.I). This data indicates that hemodynamics forces produced in the OFT  
220 induce NO production and that Pz1b plays a role in detecting these forces. Previous research  
221 has identified that the extracellular matrix (ECM) component, Elastin, is produced in the OFT  
222 where it provides the elasticity to cope with increasing hemodynamic load and to dampen the  
223 force of blood as it is ejected from the ventricle<sup>25</sup>. We performed immunohistochemistry on  
224 72hpf zebrafish larvae using a previously described ElastinB (ElnB) antibody<sup>25</sup>, and were able

225 to determine that ElnB is produced by cells which ensheath the developing OFT endothelium  
226 (Suppl.fig.5.J-L). Where these cells originate from is at present ambiguous however, both  
227 neural crest cells and second heart field progenitors do appear to contribute<sup>26, 27</sup>. We next  
228 assessed whether hemodynamic forces could play a role in triggering ElnB production. To  
229 achieve this we performed ISH using an *elnB* riboprobe on 72hpf zebrafish larvae. Under  
230 normal conditions we could detect a clear and specific expression of *elnB* in the OFT  
231 (Suppl.fig.5.M). However, analysis of *tnnt2* morphants which lack a heartbeat, and so are  
232 devoid of hemodynamic forces, revealed an obvious loss of *elnB* expression in the OFT  
233 (Suppl.fig.5.N). Similarly, in *Pz1b* morphants, *elnB* expression is also appreciably reduced  
234 (Suppl.fig.5.O) and lastly, in embryos treated with TRIM to inhibit NO production, *elnB*  
235 expression in the OFT is clearly reduced (Suppl.fig.5.P). These data indicate that *elnB*  
236 expression in the OFT is hemodynamically dependent and that both *Pz1b* and NO are required  
237 for this process. Previously we have shown that the ECM component AggrecanA (*Acana*) is  
238 also expressed in the same population of cells as ElnB and in a hemodynamically dependent  
239 manner<sup>28</sup>. Furthermore, our data indicates that reduced *AGGRECAN* expression is associated  
240 with type 0 BAV in humans. Due to this, we next analysed whether *Pz1b* could regulate the  
241 expression of *acana*. ISH using an *acana* riboprobe on 72hpf WT zebrafish larvae indicates that  
242 *acana* is strongly expressed in the OFT at this timepoint (Suppl.fig.5.Q). Conversely, when  
243 *Pz1b* is knocked down the expression of *acana* in the OFT is clearly reduced (Suppl.fig.5.R).  
244 Taken together our data highlights a potentially novel signaling pathway initiated by  
245 hemodynamic forces in the OFT which are subsequently detected by *Pz1b*, this, in turn, triggers  
246 NO to be released, which subsequently initiates the production of ElnB and Acana  
247 (Suppl.fig.7).

248

249

250 **Identification of human variants in *PIEZO1* associated with BAV.**

251 To determine whether mutations in *PIEZO1* are associated with valvulopathies such as BAV,  
252 we examined whole exome sequence data generated in-house from 19 patients diagnosed with  
253 isolated BAV. In parallel, we also analysed whole exome sequence data from 30 BAV patients  
254 provided by the National Heart, Lung, and Blood Institute (NHLBI) Bench to Bassinet  
255 Program: The Pediatric Cardiac Genetics Consortium (PCGC) dataset (dbGaP accession  
256 phs000571.v3.p2.). In this manner, we were able to identify 3 independent nonsynonymous  
257 variants in *PIEZO1*: p.Tyr2022His (c.6064T>C; p.Y2022H; located in a transmembrane C-  
258 terminal domain (in-house analysis)), p.Lys2502Arg (c.7505A>G; p.K2502R; located in the  
259 cytoplasmic C-terminal region of PIEZO1 (in-house analysis)) and p.Ser217Leu (c. 650C>T;  
260 p.S217L; located in N-terminal region (PCGC analysis)) (Fig.3.A-C). The heterozygous  
261 p.Y2022H and p.K2502R variants were subsequently validated by Sanger sequencing  
262 (Fig.3.B,C). Although this was not possible for the p.S217L variant, we were able to determine  
263 that one of the parents also harboured this mutation indicating that the proband is heterozygous  
264 for this variant. According to gnomAD<sup>29</sup>, all 3 variants are considered rare, with minor allele  
265 frequencies <1% (Table.1). By comparing PIEZO1 orthologs in different species it is apparent  
266 that Tyr<sub>2022</sub>, Lys<sub>2502</sub> and Ser<sub>217</sub> are evolutionary conserved amino acids (Fig.3.F). To determine  
267 the potential functional consequences these variants have on PIEZO1, they were analysed using  
268 the CADD<sup>30</sup>, Mutation Taster<sup>31</sup> and UMD Predictor programs<sup>32</sup> (Table.1). In this manner, all  
269 3 variants are predicted to be pathogenic. Pedigree analysis for all 3 probands can be found in  
270 the supplemental information.

271

272

273

## 274 **Functional analysis of BAV associated variants in *PIEZO1***

275 To determine whether the identified variants affected *PIEZO1* protein function, we performed  
276 mechano-electrophysiology analysis of HEK-293T cells transfected with either wildtype (WT)  
277 human *PIEZO1* or the p.Y2022H, p.K2502R and p.S217L variants. In this manner we were  
278 able to detect changes in current from HEK cells transfected with wildtype human *PIEZO1*  
279 (Fig.4.A,E). Conversely, cells which had been transfected with either p.Y2022H, p.K2502R or  
280 p.S217L *PIEZO1* variants showed significantly reduced mechano-stimulated currents (Fig.4.B-  
281 E). One explanation for the reduction in *PIEZO1* activity associated with these variants is that  
282 the mutations result in a reduction of cell surface expression. To assess this possibility we  
283 performed immunohistochemistry (IHC) on HEK-293T cells transfected with either wildtype  
284 human *PIEZO1* the p.Y2022H, p.K2502R or p.S217L *PIEZO1* variants. Confocal images  
285 analysis of transfected cells indicates that none of the variants appear to significantly affect the  
286 localization of *PIEZO1* to the cell surface when compared to wildtype *PIEZO1* (Fig.4.F). To  
287 confirm this observation we measured the fluorescent intensity across the cell membrane. In  
288 this manner, wildtype *PIEZO1* and all of the variants show a clear peak of intensity at the cell  
289 surface which drops sharply on the extracellular and intracellular sides when compared to GFP,  
290 which is expressed throughout the cell (Fig.4.G). This shows that aberrant trafficking of  
291 *PIEZO1* to the cell surface is not the reason for the observed reduction in activity. These data  
292 indicate that the variants p.Y2022H, p.K2502R and p.S217L have deleterious effects on  
293 *PIEZO1* protein function.

294

### 295 **p.Y2022H, p.K2502R and p.S217L *PIEZO1* variants are dominant negative isoforms.**

296 Because all 3 probands are heterozygous for their respective variants, we next sought to  
297 ascertain whether the association with BAV was due to haploinsufficiency or to a possible  
298 dominant negative effect of these mutations. When wildtype human *PIEZO1* was co-transfected

299 with either p.Y2022H, p.K2502R or p.S217L *PIEZO1* variants, there was a significant decrease  
300 in current amplitude compared to the control (Fig.5.A-E). Taken together these data indicate  
301 that the p.Y2022H, p.K2502R and p.S217L *PIEZO1* variants act as dominant negatives.

302 Next we sought to determine whether forced expression of the dominant negative human  
303 *PIEZO1* variants in the zebrafish endothelium could also affect aortic valve development. To  
304 achieve this we generated a transgenic construct using the endothelial specific *fliEP* promoter<sup>33</sup>  
305 to drive expression of either WT *PIEZO1* or the variants specifically in endothelial cells *in vivo*.  
306 In this manner we were able to determine that expressing any of the dominant negative variants  
307 (p.Y2022H, p.K2502R or p.S217L) also had a significant impact on aortic valve development  
308 when compared to WT *PIEZO1* expression. To assess this in more detail we performed a  
309 quantification of the defective valves by dividing the length of either leaflet by its width  
310 (Fig.6.A,B). In this manner we found that all the variants significantly reduced the overall  
311 length/width ratio in both leaflets when compared to the WT *PIEZO1* expressing larvae. This  
312 indicates that expression of either Y2022H, p.K2502R or p.S217L *PIEZO1* disrupts aortic valve  
313 development in zebrafish.

314

## 315 **Discussion**

316 Despite the differences in cardiac physiology, early OFT development is highly  
317 conserved between mammals and zebrafish, in particular this region will give rise to the aortic  
318 valves. Recently, it has been established that the coordinated actions of the mechanosensitive  
319 ion channels TRPV4 and TRPP2 are required to promote *klf2a* expression in the AV canal and  
320 subsequently drive valve morphogenesis in this region<sup>34</sup>. It appears that Pz1b may play a similar  
321 mechanosensory role in the OFT where it is required to trigger NO production in response to  
322 increasing hemodynamic load. How Pz1b triggers NO production is at present unclear, however  
323 previous research has highlighted a feedback mechanism that involves the release of ATP from

324 the endothelium which activates a P2Y2 signalling cascade resulting in NOS activation<sup>35</sup>.  
325 Interestingly, treating zebrafish embryos with the Nitric Oxide Synthase (NOS) inhibitor TRIM  
326 also disrupts OFT development and leads to a similar cardiac phenotype<sup>36</sup> while mice deficient  
327 in Endothelial Nitric Oxide Synthase (eNOS) develop BAV<sup>37, 38</sup>. Our results are also in line  
328 with mammalian data that indicates a direct regulation of eNOS by PIEZO1<sup>8</sup>. *NOTCH1* is one  
329 of the few genes directly linked to BAV in humans and evidence suggests that NO can also  
330 regulate NOTCH1 signaling during aortic valve development. Compound mutant mice which  
331 are *eNOS*<sup>-/-</sup>;*Notch1*<sup>+/-</sup> show a dramatic increase in the prevalence of BAV when compared to  
332 either *eNOS*<sup>-/-</sup> or *Notch1*<sup>+/-</sup> alone<sup>39</sup>. Our own data indicates that the zebrafish *NOTCH1* ortholog  
333 *notch1b* also regulates aortic valve development. Indeed, zebrafish *notch1b* mutants display  
334 dysmorphic valves. Importantly, we also observed a very similar aortic valve phenotype in Pz1b  
335 morphant larvae indicating that this gene is also required for aortic valve development. Future  
336 investigation will be aimed trying to ascertain whether Pz1b mediated NO release acts  
337 synergistically with Notch1b during valve development.

338 In humans, disruption of ECM components has been linked to a variety of OFT  
339 pathologies such as aortic stenosis (AS) and bicuspid aortic valves (BAV)<sup>40-42</sup>. Mutations and  
340 decreased expression of *ELASTIN* have been linked to supravalvar aortic stenosis (SVAS), a  
341 condition which leads to the narrowing of the aorta adjacent to the aortic valve<sup>41</sup>. Furthermore,  
342 a chromosomal microdeletion which includes *ELASTIN* causes Williams Beuren syndrome  
343 which manifests with a variety of developmental defects including SVAS and BAV<sup>40</sup>.  
344 Similarly, *ELASTIN* haploinsufficiency in mice also leads to progressive aortic valve  
345 degeneration<sup>43</sup>. In chick embryos, *ELASTIN* production is initiated at day 3 by cells which  
346 surround the endothelium of the aorta directly adjacent to the myocardium, before spreading  
347 throughout the vasculature<sup>44</sup>. In zebrafish, Elastin production in the OFT also commences at  
348 around 3 days post fertilisation and coincides with cardiogenic events such as coordinated

349 contraction and AV canal development that place increasing hemodynamic loads on the OFT.  
350 Here we provide evidence of a novel signalling cascade initiated by hemodynamic forces in the  
351 OFT which are detected by Pz1b and ultimately leads to the expression of ECM components,  
352 such as Elastin. Future studies will be required to determine whether BAV patients who harbour  
353 deleterious *PIEZO1* variants have a decreased expression of ECM components. It will also be  
354 interesting to determine whether other ECM components such as COLLAGEN are also  
355 regulated by a similar mechanism.

356         We have also identified 3 pathogenic *PIEZO1* variants associated with BAV in humans.  
357 Although the variants we have identified inhibit *PIEZO1* function, for the p.Y2022H mutant,  
358 the proband's twin, presenting with a tricuspid valve, carried the same variant. This could be  
359 due to incomplete penetrance linked to modifiers. For example, mutations in *NOTCH1* have  
360 been linked to CHD, however the BAV phenotype is not fully penetrant<sup>16</sup>. Furthermore, it has  
361 recently been shown that in monozygotic twins, despite the absence of any pathogenic genetic  
362 differences between them, only one of the pair developed BAV<sup>45</sup>. It should be noted that  
363 inhibitory variants in *PIEZO1* are also associated with a novel form of hereditary  
364 lymphedema<sup>46, 47</sup>. Although neither report indicates the presence of BAV, it is also unclear  
365 whether the patients underwent echocardiography to detect this. However, it is interesting to  
366 note that in other conditions in which lymphedema is present, such as Turner syndrome, there  
367 is an increased prevalence of BAV (28.4%)<sup>48</sup>. Whether this is also the case for the *PIEZO1*  
368 form of lymphedema will require more detailed and expansive analysis of this condition.

369

## 370 **Funding**

371 This work was supported by INSERM and CNRS. Work in the C.J lab is supported by a grant  
372 from the Fondation Leducq. Work in the C.J lab is supported by a grant from Fondation pour  
373 la Recherche sur le Cerveau "Espoir en tête 2017". C.J was supported by an INSERM ATIP-

374 AVENIR grant and a Marie Curie CIG (PCIG12-GA-2012-332772). H.M.M is supported by a  
375 grant from the Association Française contre les Myopathies (AFM-Telethon). A.F was  
376 supported by a Fondation Lefoulon-Delalande postdoctoral fellowship with previous support  
377 provided by a Fondation pour la Recherche Médicale (FRM) postdoctoral fellowship. N.N is  
378 supported by the LabexICST PhD program. A.F, H.M.M, N.N and C.J are members of the  
379 Laboratory of Excellence « Ion Channel Science and Therapeutics » supported by a grant from  
380 the ANR. A.P. received a PhD fellowship from the Association Française du Syndrome de  
381 Marfan et Apparentés (AFSMa). Work in the G.L lab is supported by a grant from the ANR  
382 (ANR 17 CE18 0001 06 AT2R TRAAK). Work in S.Z lab is supported by the INSERM and the  
383 Association Française contre les Myopathies (AFM-Telethon). IPAM acknowledges the  
384 France-BioImaging infrastructure supported by the French National Research Agency (ANR-  
385 10-INBS-04, «Investments for the future»), the Fondation pour la Recherche sur le Cerveau  
386 “Espoir en tête 2015”, and Fondation Leducq.

387

### 388 **Acknowledgements**

389 We would like to acknowledge Dr Matteo Mangoni and Dr Joel Nargeot for their input and  
390 support. We would like to thank Prof Ardem Patapoutian for the kind gift of h*PIEZO1*-pIRES2-  
391 GFP. We would like to thank Dr Emmanuel Bourinet for the kind gift of m*Piezo1*. We would  
392 also like to acknowledge the Montpellier MGX Genomix platform for their input and support.  
393 Part of this data was generated by the Pediatric Cardiac Genomics Consortium (PCGC), under  
394 the auspices of the National Heart, Lung, and Blood Institute's Bench to Bassinet Program  
395 <<http://www.benchtobassinet.org/>>. The Pediatric Cardiac Genomics Consortium (PCGC)  
396 program is funded by the National Heart, Lung, and Blood Institute, National Institutes of  
397 Health, U.S. Department of Health and Human Services through grants U01HL098123,  
398 U01HL098147, U01HL098153, U01HL098162, U01HL098163, and U01HL098188. This



399 manuscript was not prepared in collaboration with investigators of the PCGC, has not been  
400 reviewed and/or approved by the PCGC, and does not necessarily reflect the opinions of the  
401 PCGC investigators or the NHLBI. We thank Anthony Pinot from the *in vivo* imaging platform  
402 IPAM-Biocampus Montpellier.

403

#### 404 **Conflicts of Interests**

405 None declared

#### 406 **References**

- 407 1. Granados-Riveron JT, Brook JD. The impact of mechanical forces in heart morphogenesis. *Circ*  
408 *Cardiovasc Genet* 2012;**5**:132-142.
- 409 2. Freund JB, Goetz JG, Hill KL, Vermot J. Fluid flows and forces in development: functions,  
410 features and biophysical principles. *Development* 2012;**139**:1229-1245.
- 411 3. Lansman JB, Hallam TJ, Rink TJ. Single stretch-activated ion channels in vascular endothelial  
412 cells as mechanotransducers? *Nature* 1987;**325**:811-813.
- 413 4. Goetz JG, Steed E, Ferreira RR, Roth S, Ramspacher C, Boselli F, Charvin G, Liebling M, Wyart C,  
414 Schwab Y, Vermot J. Endothelial cilia mediate low flow sensing during zebrafish vascular  
415 development. *Cell Rep* 2014;**6**:799-808.
- 416 5. Hove JR, Koster RW, Forouhar AS, Acevedo-Bolton G, Fraser SE, Gharib M. Intracardiac fluid  
417 forces are an essential epigenetic factor for embryonic cardiogenesis. *Nature* 2003;**421**:172-  
418 177.
- 419 6. Busse R, Fleming I. Vascular endothelium and blood flow. *Handb Exp Pharmacol* 2006:43-78.
- 420 7. Coste B, Xiao B, Santos JS, Syeda R, Grandl J, Spencer KS, Kim SE, Schmidt M, Mathur J, Dubin  
421 AE, Montal M, Patapoutian A. Piezo proteins are pore-forming subunits of mechanically  
422 activated channels. *Nature* 2012;**483**:176-181.
- 423 8. Li J, Hou B, Tumova S, Muraki K, Bruns A, Ludlow MJ, Sedo A, Hyman AJ, McKeown L, Young  
424 RS, Yuldasheva NY, Majeed Y, Wilson LA, Rode B, Bailey MA, Kim HR, Fu Z, Carter DA, Bilton J,  
425 Imrie H, Ajuh P, Dear TN, Cubbon RM, Kearney MT, Prasad RK, Evans PC, Ainscough JF, Beech  
426 DJ. Piezo1 integration of vascular architecture with physiological force. *Nature* 2014.
- 427 9. Ranade SS, Qiu Z, Woo SH, Hur SS, Murthy SE, Cahalan SM, Xu J, Mathur J, Bandell M, Coste B,  
428 Li YS, Chien S, Patapoutian A. Piezo1, a mechanically activated ion channel, is required for  
429 vascular development in mice. *Proc Natl Acad Sci U S A* 2014;**111**:10347-10352.
- 430 10. Nonomura K, Lukacs V, Sweet DT, Goddard LM, Kanie A, Whitwam T, Ranade SS, Fujimori T,  
431 Kahn ML, Patapoutian A. Mechanically activated ion channel PIEZO1 is required for lymphatic  
432 valve formation. *Proc Natl Acad Sci U S A* 2018;**115**:12817-12822.
- 433 11. Menon V, Eberth JF, Goodwin RL, Potts JD. Altered Hemodynamics in the Embryonic Heart  
434 Affects Outflow Valve Development. *Journal of cardiovascular development and disease*  
435 2015;**2**:108-124.
- 436 12. Faucherre A, Kissa K, Nargeot J, Mangoni M, Jopling C. Piezo1 plays a role in erythrocyte  
437 volume homeostasis. *Haematologica* 2013.
- 438 13. Faucherre A, Nargeot J, Mangoni ME, Jopling C. piezo2b regulates vertebrate light touch  
439 response. *J Neurosci* 2013;**33**:17089-17094.
- 440 14. Bae C, Sachs F, Gottlieb PA. The mechanosensitive ion channel Piezo1 is inhibited by the  
441 peptide GsMTx4. *Biochemistry* 2011;**50**:6295-6300.

- 442 15. Vermot J, Forouhar AS, Liebling M, Wu D, Plummer D, Gharib M, Fraser SE. Reversing blood  
443 flows act through *klf2a* to ensure normal valvulogenesis in the developing heart. *PLoS Biol*  
444 2009;**7**:e1000246.
- 445 16. Garg V, Muth AN, Ransom JF, Schluterman MK, Barnes R, King IN, Grossfeld PD, Srivastava D.  
446 Mutations in NOTCH1 cause aortic valve disease. *Nature* 2005;**437**:270-274.
- 447 17. Giusti B, Sticchi E, De Cario R, Magi A, Nistri S, Pepe G. Genetic Bases of Bicuspid Aortic Valve:  
448 The Contribution of Traditional and High-Throughput Sequencing Approaches on Research and  
449 Diagnosis. *Frontiers in physiology* 2017;**8**:612.
- 450 18. Goishi K, Lee P, Davidson AJ, Nishi E, Zon LI, Klagsbrun M. Inhibition of zebrafish epidermal  
451 growth factor receptor activity results in cardiovascular defects. *Mechanisms of development*  
452 2003;**120**:811-822.
- 453 19. Bo Holmqvist, Lars Ebbesson and Per Alm. Nitric oxide and the zebrafish (*Danio rerio*):  
454 Developmental neurobiology and brain neurogenesis. *Advances in experimental biology*:  
455 elsevier, 2007:229-273.
- 456 20. Lepiller S, Laurens V, Bouchot A, Herbomel P, Solary E, Chluba J. Imaging of nitric oxide in a  
457 living vertebrate using a diamino-fluorescein probe. *Free Radic Biol Med* 2007;**43**:619-627.
- 458 21. Grimes AC, Stadt HA, Shepherd IT, Kirby ML. Solving an enigma: arterial pole development in  
459 the zebrafish heart. *Developmental biology* 2006;**290**:265-276.
- 460 22. Banjo T, Grajcarek J, Yoshino D, Osada H, Miyasaka KY, Kida YS, Ueki Y, Nagayama K, Kawakami  
461 K, Matsumoto T, Sato M, Ogura T. Haemodynamically dependent valvulogenesis of zebrafish  
462 heart is mediated by flow-dependent expression of miR-21. *Nat Commun* 2013;**4**:1978.
- 463 23. Bartman T, Walsh EC, Wen KK, McKane M, Ren J, Alexander J, Rubenstein PA, Stainier DY. Early  
464 myocardial function affects endocardial cushion development in zebrafish. *PLoS Biol*  
465 2004;**2**:E129.
- 466 24. Huang W, Zhang R, Xu X. Myofibrillogenesis in the developing zebrafish heart: A functional  
467 study of *tnnt2*. *Developmental biology* 2009;**331**:237-249.
- 468 25. Miao M, Bruce AE, Bhanji T, Davis EC, Keeley FW. Differential expression of two tropoelastin  
469 genes in zebrafish. *Matrix biology : journal of the International Society for Matrix Biology*  
470 2007;**26**:115-124.
- 471 26. Cavanaugh AM, Huang J, Chen JN. Two developmentally distinct populations of neural crest  
472 cells contribute to the zebrafish heart. *Developmental biology* 2015;**404**:103-112.
- 473 27. Zhou Y, Cashman TJ, Nevis KR, Obregon P, Carney SA, Liu Y, Gu A, Mosimann C, Sondalle S,  
474 Peterson RE, Heideman W, Burns CE, Burns CG. Latent TGF-beta binding protein 3 identifies a  
475 second heart field in zebrafish. *Nature* 2011;**474**:645-648.
- 476 28. Rambeau P, Faure E, Theron A, Avierinos JF, Jopling C, Zaffran S, Faucherre A. Reduced  
477 aggrecan expression affects cardiac outflow tract development in zebrafish and is associated  
478 with bicuspid aortic valve disease in humans. *International journal of cardiology* 2017.
- 479 29. Lek M, Karczewski KJ, Minikel EV, Samocha KE, Banks E, Fennell T, O'Donnell-Luria AH, Ware  
480 JS, Hill AJ, Cummings BB, Tukiainen T, Birnbaum DP, Kosmicki JA, Duncan LE, Estrada K, Zhao F,  
481 Zou J, Pierce-Hoffman E, Berghout J, Cooper DN, Deflaux N, DePristo M, Do R, Flannick J,  
482 Fromer M, Gauthier L, Goldstein J, Gupta N, Howrigan D, Kiezun A, Kurki MI, Moonshine AL,  
483 Natarajan P, Orozco L, Peloso GM, Poplin R, Rivas MA, Ruano-Rubio V, Rose SA, Ruderfer DM,  
484 Shakir K, Stenson PD, Stevens C, Thomas BP, Tiao G, Tusie-Luna MT, Weisburd B, Won HH, Yu  
485 D, Altshuler DM, Ardissino D, Boehnke M, Danesh J, Donnelly S, Elosua R, Florez JC, Gabriel SB,  
486 Getz G, Glatt SJ, Hultman CM, Kathiresan S, Laakso M, McCarroll S, McCarthy MI, McGovern D,  
487 McPherson R, Neale BM, Palotie A, Purcell SM, Saleheen D, Scharf JM, Sklar P, Sullivan PF,  
488 Tuomilehto J, Tsuang MT, Watkins HC, Wilson JG, Daly MJ, MacArthur DG, Exome Aggregation  
489 C. Analysis of protein-coding genetic variation in 60,706 humans. *Nature* 2016;**536**:285-291.
- 490 30. Kircher M, Witten DM, Jain P, O'Roak BJ, Cooper GM, Shendure J. A general framework for  
491 estimating the relative pathogenicity of human genetic variants. *Nature genetics* 2014;**46**:310-  
492 315.

- 493 31. Schwarz JM, Cooper DN, Schuelke M, Seelow D. MutationTaster2: mutation prediction for the  
494 deep-sequencing age. *Nature methods* 2014;**11**:361-362.
- 495 32. Salgado D, Desvignes JP, Rai G, Blanchard A, Miltgen M, Pinard A, Levy N, Collod-Beroud G,  
496 Beroud C. UMD-Predictor: A High-Throughput Sequencing Compliant System for Pathogenicity  
497 Prediction of any Human cDNA Substitution. *Human mutation* 2016;**37**:439-446.
- 498 33. Villefranc JA, Amigo J, Lawson ND. Gateway compatible vectors for analysis of gene function  
499 in the zebrafish. *Developmental dynamics : an official publication of the American Association*  
500 *of Anatomists* 2007;**236**:3077-3087.
- 501 34. Heckel E, Boselli F, Roth S, Krudewig A, Belting HG, Charvin G, Vermot J. Oscillatory Flow  
502 Modulates Mechanosensitive klf2a Expression through trpv4 and trpp2 during Heart Valve  
503 Development. *Current biology : CB* 2015;**25**:1354-1361.
- 504 35. Wang S, Chennupati R, Kaur H, Iring A, Wettschureck N, Offermanns S. Endothelial cation  
505 channel PIEZO1 controls blood pressure by mediating flow-induced ATP release. *The Journal*  
506 *of clinical investigation* 2016;**126**:4527-4536.
- 507 36. Bo Holmqvist, Lars Ebbesson and Per Alm. Nitric oxide and the zebrafish (*Danio rerio*):  
508 Developmental neurobiology and brain neurogenesis. *Adv Exp Biol: elsevier*, 2007:229-273.
- 509 37. Lee TC, Zhao YD, Courtman DW, Stewart DJ. Abnormal aortic valve development in mice  
510 lacking endothelial nitric oxide synthase. *Circulation* 2000;**101**:2345-2348.
- 511 38. Aboulhosn J, Child JS. Left ventricular outflow obstruction: subaortic stenosis, bicuspid aortic  
512 valve, supralvalvar aortic stenosis, and coarctation of the aorta. *Circulation* 2006;**114**:2412-  
513 2422.
- 514 39. Bosse K, Hans CP, Zhao N, Koenig SN, Huang N, Guggilam A, LaHaye S, Tao G, Lucchesi PA,  
515 Lincoln J, Lilly B, Garg V. Endothelial nitric oxide signaling regulates Notch1 in aortic valve  
516 disease. *Journal of molecular and cellular cardiology* 2013;**60**:27-35.
- 517 40. Padang R, Bagnall RD, Semsarian C. Genetic basis of familial valvular heart disease. *Circ*  
518 *Cardiovasc Genet* 2012;**5**:569-580.
- 519 41. Merla G, Brunetti-Pierri N, Piccolo P, Micale L, Loviglio MN. Supralvalvular aortic stenosis:  
520 elastin arteriopathy. *Circ Cardiovasc Genet* 2012;**5**:692-696.
- 521 42. Lincoln J, Lange AW, Yutzey KE. Hearts and bones: shared regulatory mechanisms in heart  
522 valve, cartilage, tendon, and bone development. *Developmental biology* 2006;**294**:292-302.
- 523 43. Hinton RB, Adelman-Brown J, Witt S, Krishnamurthy VK, Osinska H, Sakthivel B, James JF, Li DY,  
524 Narmoneva DA, Mecham RP, Benson DW. Elastin haploinsufficiency results in progressive  
525 aortic valve malformation and latent valve disease in a mouse model. *Circ Res* 2010;**107**:549-  
526 557.
- 527 44. Rosenquist TH, Beall AC. Elastogenic cells in the developing cardiovascular system. Smooth  
528 muscle, nonmuscle, and cardiac neural crest. *Annals of the New York Academy of Sciences*  
529 1990;**588**:106-119.
- 530 45. Hui DS, Bonow RO, Stolker JM, Braddock SR, Lee R. Discordant Aortic Valve Morphology in  
531 Monozygotic Twins: A Clinical Case Series. *JAMA cardiology* 2016.
- 532 46. Lukacs V, Mathur J, Mao R, Bayrak-Toydemir P, Procter M, Cahalan SM, Kim HJ, Bandell M,  
533 Longo N, Day RW, Stevenson DA, Patapoutian A, Krock BL. Impaired PIEZO1 function in patients  
534 with a novel autosomal recessive congenital lymphatic dysplasia. *Nat Commun* 2015;**6**:8329.
- 535 47. Fotiou E, Martin-Almedina S, Simpson MA, Lin S, Gordon K, Brice G, Atton G, Jeffery I, Rees DC,  
536 Mignot C, Vogt J, Homfray T, Snyder MP, Rockson SG, Jeffery S, Mortimer PS, Mansour S,  
537 Ostergaard P. Novel mutations in PIEZO1 cause an autosomal recessive generalized lymphatic  
538 dysplasia with non-immune hydrops fetalis. *Nat Commun* 2015;**6**:8085.
- 539 48. Klaskova E, Zapletalova J, Kapralova S, Snajderova M, Lebl J, Tudos Z, Pavlicek J, Cerna J, Mihal  
540 V, Stara V, Prochazka M. Increased prevalence of bicuspid aortic valve in Turner syndrome links  
541 with karyotype: the crucial importance of detailed cardiovascular screening. *Journal of*  
542 *pediatric endocrinology & metabolism : JPEM* 2017;**30**:319-325.

543 49. Zhao Q, Zhou H, Chi S, Wang Y, Wang J, Geng J, Wu K, Liu W, Zhang T, Dong MQ, Wang J, Li X,  
544 Xiao B. Structure and mechanogating mechanism of the Piezo1 channel. *Nature* 2018;**554**:487-  
545 492.

546

## 547 **Figure legends**

548 **Figure 1. Identifying the zebrafish endothelial *PIEZO1* ortholog.**

549 **(A,B)** ISH using an antisense Pz1b probe. Pz1b expression can be detected in the OFT of  
550 zebrafish larvae (yellow arrowhead) at 4dpf. **(C-E)** Double fluorescent ISH using antisense  
551 GFP **(C)** and antisense Pz1b **(D)** probes, merged image **(E)** indicates endothelial GFP and Pz1b  
552 co-localise in the OFT endothelium at 4dpf in *Tg(fli1a:GFP)y1* embryos. **(F,G)**  
553 Electrophysiological recordings of mechanosensitive currents from embryonic endothelial  
554 cells. Currents were recorded via patch clamp using and inside out configuration by application  
555 of negative pressures from 0 to -80mmHg with -10mmHg step increments at -80mV potential.  
556 **(F)** Typical current traces recorded from cells isolated from control, Pz1b MO, Pz2 MO injected  
557 embryos and cell treated with GsMTx4 *via* the patch clamp pipette. The pressure stimulation  
558 protocol is shown in inset. **(G)** Corresponding pressure/current curves showing the activation  
559 of the current from control, Pz1b, Pz2 MO cells and GsMTx4 treated cells (\* p<0,05, \*\* p<0.01,  
560 student's t-test). The red rectangle shows the value of the current amplitude for the three test  
561 conditions at -50 mmHg step stimulation. Scale bars: **(A,B)** 100µm **(E)** 10µm.

562

563 **Figure.2. *Piezo1b* is required for aortic valve development.**

564 2 photon images of aortic valves in 7dpf zebrafish larvae labelled with BODIPY. **(A)**  
565 Representative image of the aortic valves in a WT larvae, valves are outlined with a dashed  
566 white line (n=8). **(B)** A Pz1b morphant (n=6). **(C)** A *notch1b* mutant (n=11). **(D)** A AG1478  
567 treated larvae (n=6). **(E)** A PKI166 treated larvae (n=6). **(F)** A TRIM treated larvae (n=7).

568

569

570 **Figure 3. Identification of variants in *PIEZO1* associated with BAV.**

571 (A) Schematic representation of human *PIEZO1* protein, the position of each variant is  
572 indicated by a red dot (adapted from *Zhao et al*<sup>49</sup>). (B,C) Cartoon representation of the mouse  
573 mechanosensitive Piezo1 channel 3D Model (PDB 5Z10). The corresponding residues K2502  
574 (Magenta) and Y2022 (Green) identified in this study as subject to genetic variability are  
575 represented as spheres. (D,E) Sequence chromatographs showing heterozygous variants  
576 c.6064T>C (p.Y2022H; B) and c.7505A>G (p.K2502R; C) in genomic DNA taken from the  
577 affected BAV patients. (F) Protein alignments for all 3 variants. Note the strong evolutionary  
578 conservation for Tyr2022, Lys2502 and Ser217 residues. (G-I) Representative echocardiogram  
579 of the aortic valve from an unaffected individual (G) and the BAV patients carrying out the  
580 c.6064T>C; p.Y2022H variant (H) and c.7505A>G; p.K2502R variant (I). Note the 3 valve  
581 leaflets in the unaffected individual (G) compared to the 2 leaflets in the BAV patients (H and  
582 G).

583

584 **Figure 4. Functional analysis of BAV associated variants in *PIEZO1*.**

585 Electrophysiological recordings of mechanosensitive currents from all 3 *PIEZO1* variants  
586 associated with BAV. Typical current traces recorded from HEK cells transfected with either  
587 wildtype (WT) human *PIEZO1* (hPz1) (A), human *PIEZO1* c.6064T>C (p.Y2022H) variant  
588 (B), human *PIEZO1* c.7075A>G (p.K2502R) (C) variant or human *PIEZO1* c.650C>T  
589 (p.S217L) variant (D). Currents were recorded *via* patch clamp using a cell attached  
590 configuration by application of negative pressures from 0 to -80mmHg with -10mmHg step  
591 increments at -80mV potential. (E) Corresponding pressure/current curves showing the  
592 activation of the current from wildtype hPz1, p.Y2022H, p.K2502R and p.S217L (\* p<0,05, \*\*  
593 p<0.01, \*\*\* p<0.001 student's t-test). (F) Immunohistochemistry using an anti *PIEZO1*  
594 antibody on HEK 293T cells transfected with either empty vector (pIRES2-GFP), wildtype

595 human *PIEZO1* (wt-hPz1), human *PIEZO1* c.6064T>C (p.Y2022H) variant (Y2022H-hPz1),  
596 human *PIEZO1* c.7075A>G (p.K2502R) variant (K2502R-hPz1) or human *PIEZO1* c.650C>T  
597 (p.S217L) variant (S217L-hPz1). **(G)** Cell surface immunofluorescent analysis. Fluorescent  
598 intensity was measured in ImageJ by drawing a line through the cell membrane (yellow bar).  
599 Graphs plotting the fluorescent intensity at the cell surface for WT and variant *PIEZO1*. In all  
600 cases there is a clear peak of RFP fluorescent intensity which tapers off on either side of the  
601 cell membrane. The control GFP signal is continuous. Scale bars (F) 10 $\mu$ m.

602

### 603 Figure 5. **BAV associated *PIEZO1* variants are dominant negatives**

604 Electrophysiological recordings of mechanosensitive currents from co-transfection of 3  
605 *PIEZO1* variants with wildtype human *PIEZO1*. Typical current traces recorded from HEK  
606 cells co-transfected with either wildtype human *PIEZO1* (hPz1) and empty pIRES2-GFP **(A)**,  
607 wildtype human *PIEZO1* (hPz1) and human *PIEZO1* c.6064T>C (p.Y2022H) variant **(B)**,  
608 wildtype human *PIEZO1* (hPz1) and human *PIEZO1* c.7075A>G (p.K2502R) variant **(C)** or  
609 wildtype human *PIEZO1* (hPz1) and human *PIEZO1* c.650C>T (p.S217L) **(D)**. Currents were  
610 recorded *via* patch clamp using a cell attached configuration by application of negative  
611 pressures from 0 to -80mmHg with -10mmHg step increments at -80mV potential. **(E)**  
612 Corresponding pressure/current curves showing the activation of the current from wildtype  
613 hPz1/empty pIRES2-GFP, wildtype hPz1/p.Y2022H, wildtype hPz1/p.K2502R and wildtype  
614 hPz1/p.S217L (\* p<0,05, \*\* p<0.01, \*\*\* p<0.001 student's t-test).

615

### 616 Figure 6. **Expression of *PIEZO1* variants *in vivo* disrupts aortic valve development**

617 **(A)** Representative images of aortic valve leaflet quantification in a 7dpf larvae expressing  
618 either WT human *PIEZO1* (hPZ1-wt) or the Y2022H variant of human *PIEZO1* (hPZ1-  
619 Y2022H), ratios were calculated by measuring the length of the leaflet from the lower edge to

620 the tip, the width was measured at a point halfway along the length (yellow lines). **(B)** Graph  
621 depicting the length to width ratio for the left and right valve leaflets measured in 7dpf larvae  
622 expressing either WT (n=8), K2502R (n=11), Y2022H(n=10) or S217L (n=10) human *PIEZO1*.  
623 Error bars indicate SEM, ANOVA and Dunnet's multiple comparisons test  $P < 0.01$  (all  
624 samples), student's unpaired homoscedastic two tailed t-test  $**P < 0.01$ . Scale bars-20 $\mu$ m.  
625

| <i>Piezo1</i> mutation  | CADD-PHRED      | Mutation Taster | UMD Predictor            | gnomAD allele frequencies |
|-------------------------|-----------------|-----------------|--------------------------|---------------------------|
| p.Y2022H<br>(c.6064T>C) | Damaging (27.1) | Damaging (0.58) | Pathogenic (99)          | 3.336 10 <sup>-5</sup>    |
| p.K2502R<br>(c.7505A>G) | Damaging (25.6) | Damaging (0.80) | Probably pathogenic (69) | 6.498 10 <sup>-3</sup>    |
| p.S217L<br>(c.650C>T)   | Damaging (25.6) | Damaging (0.54) | Pathogenic (78)          | Not reported              |

**Table.1. Prediction analysis of *PIEZO1* mutations.**



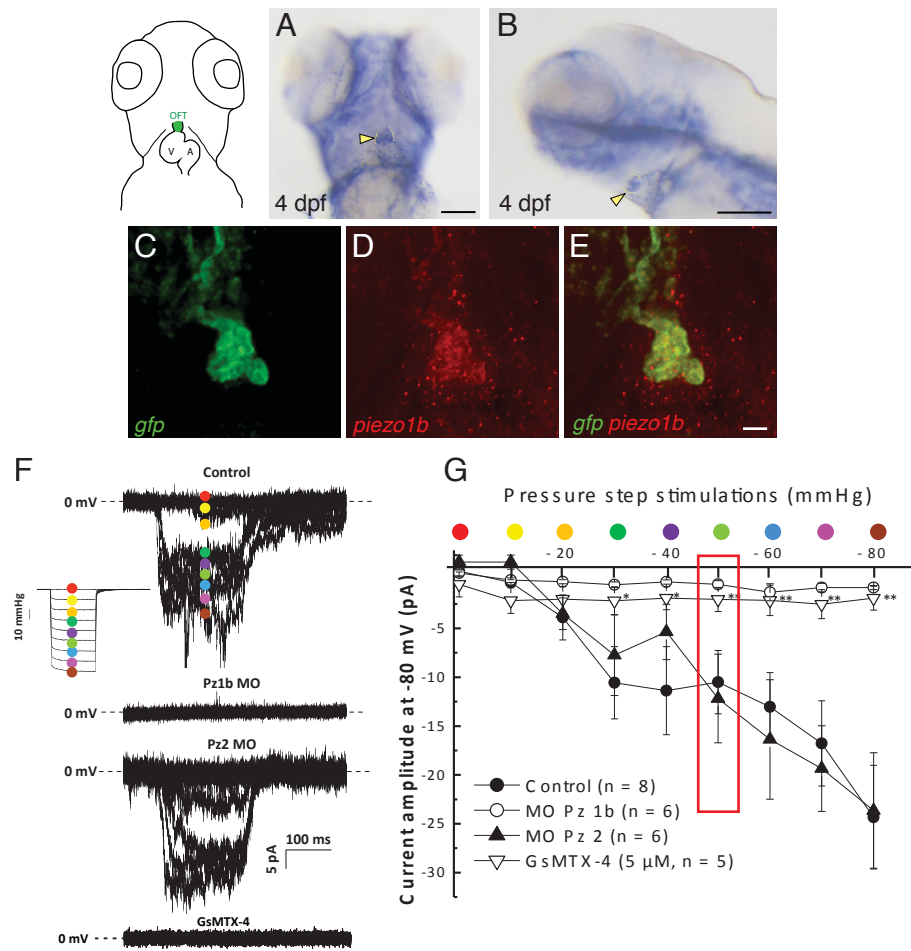

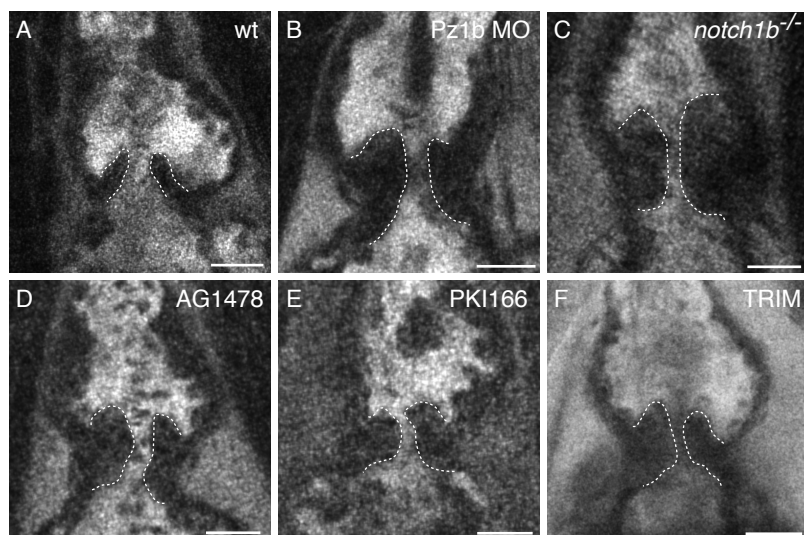

A

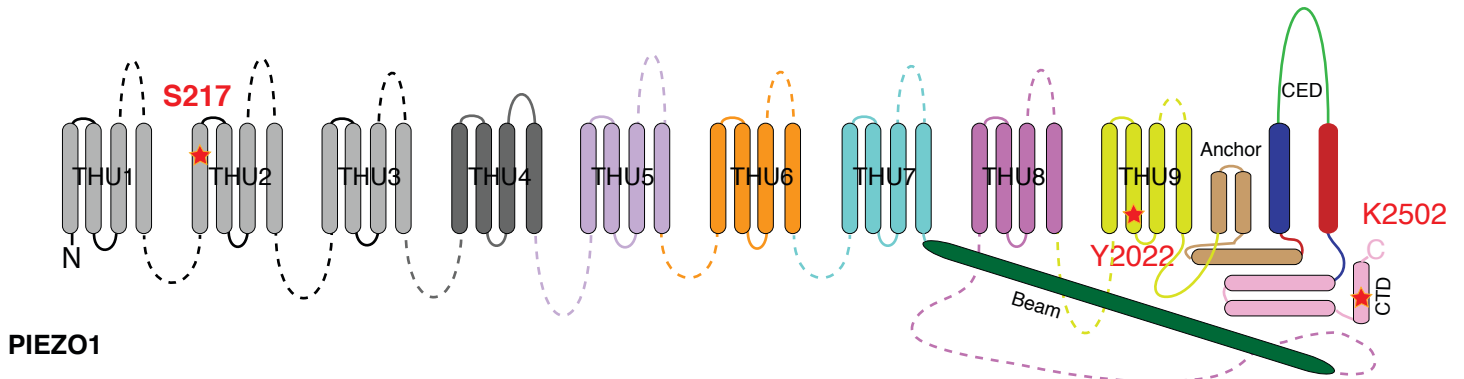

B

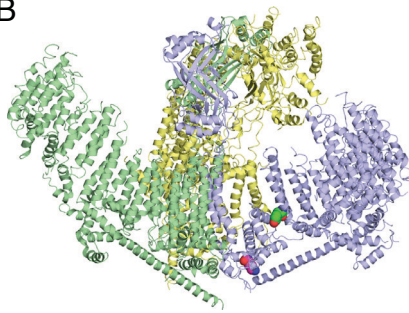

C

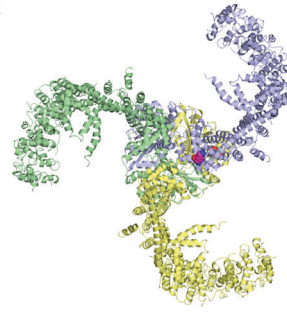

D

p.Y2022H

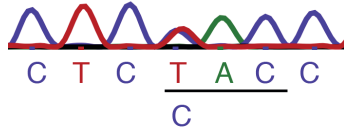

E

p.K2502R

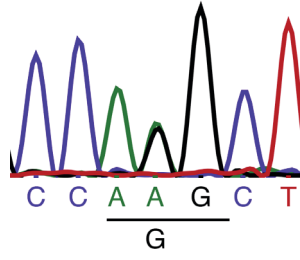

F

|            | 2022           | 2502          | 217           |
|------------|----------------|---------------|---------------|
| human      | VDRAL Y LRKTV  | EELYA K LIFLY | GIAHP S ALSSV |
| mouse      | IDRAL Y LRKTV  | EELYA K LIFLY | GIAHP S AFSSI |
| chicken    | IDRAL Y LRKTV  | EELYA K LIFLY | GITLP S ASSSV |
| zebrafish  | VDRAL Y LRKTV  | EDLYA K LIFLY | GMMLP S LTSSV |
| drosophila | IDRAL Y LRKAL  | EDLFA K LLFLY | AVLRP S VPGGF |
|            | :**** * ***: : | *:*. * *:*    | :. * * ...    |

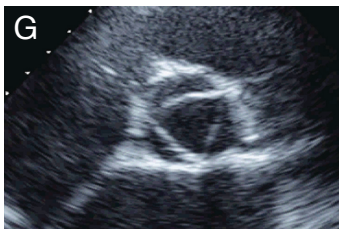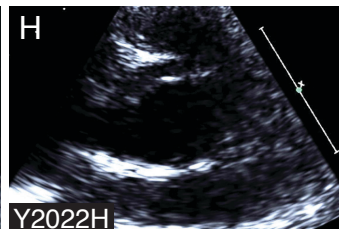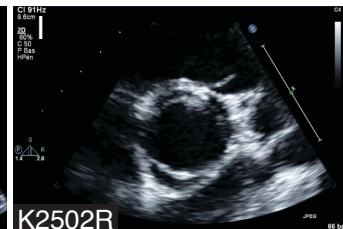

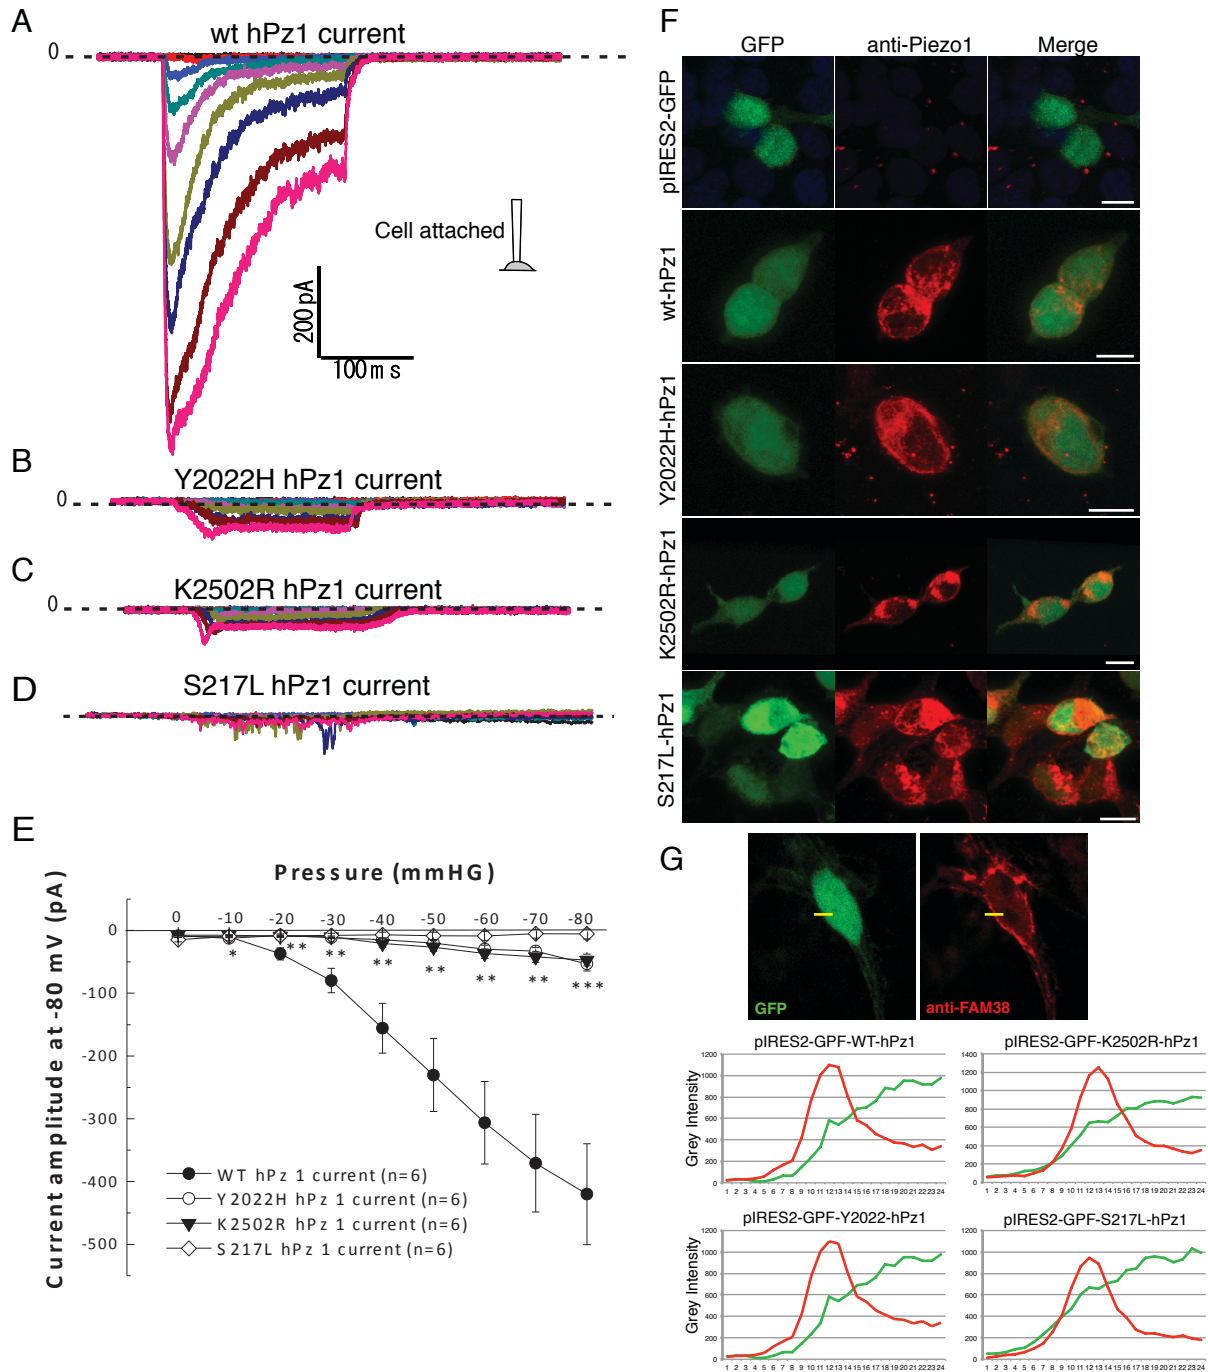

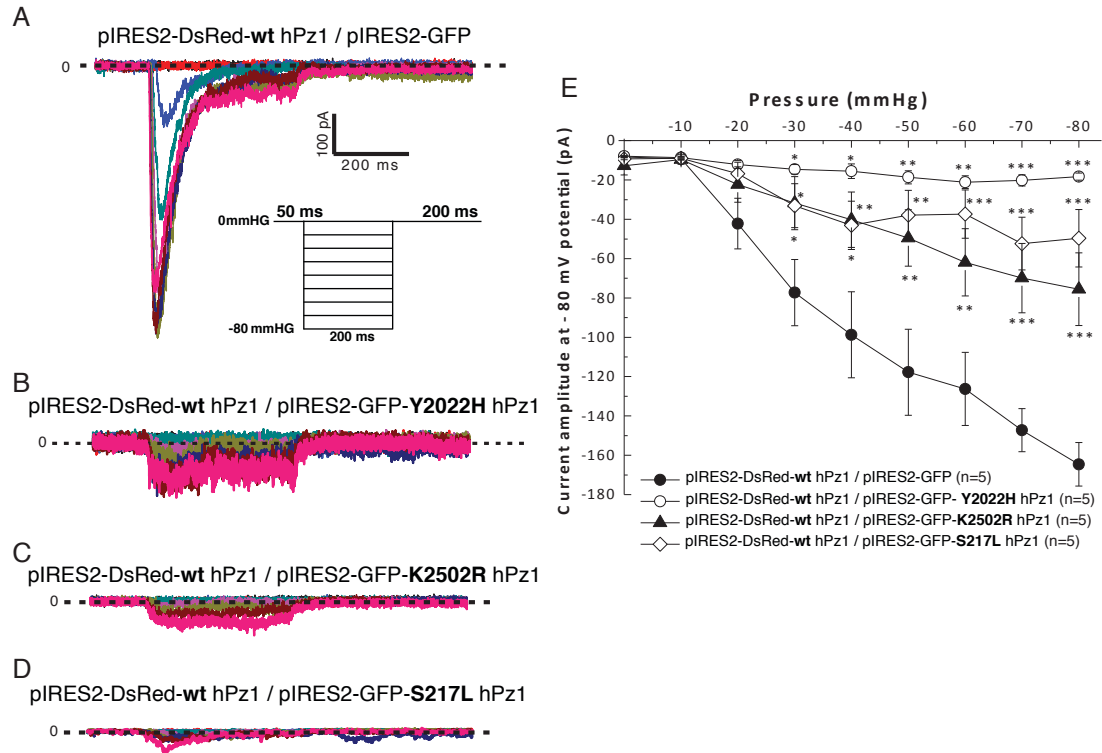

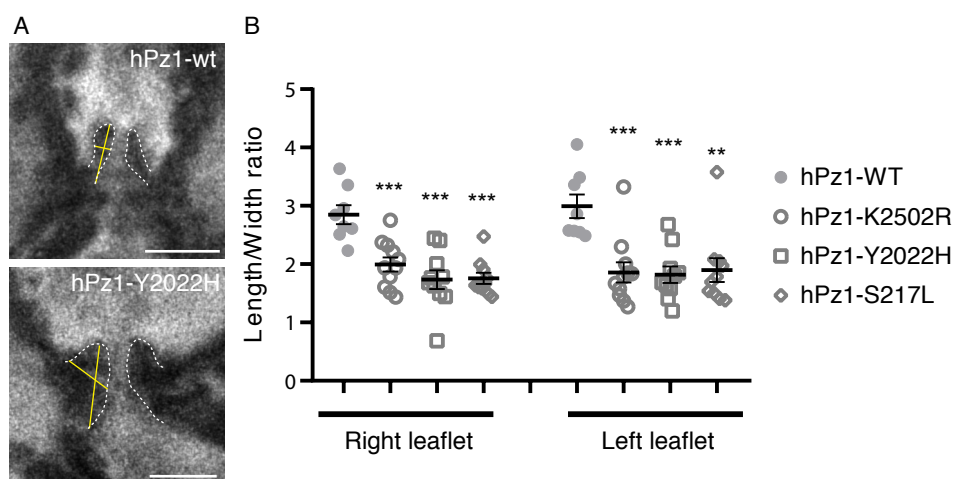

## 1 **Supplemental information**

### 2 **Pedigree analysis of BAV patients harboring variants in *PIEZO1***

3 The BAV phenotype found in the p.Y2022H and p.K2502R probands was diagnosed by  
4 echocardiography (Fig.3.G-I). The proband carrying the p.Y2022H (c.6064T>C) variant was  
5 diagnosed in childhood with several congenital malformations including a BAV without  
6 ascending aorta aneurysm, a left arm agenesis, a bicornate uterus and a urogenital malformation.  
7 Physical examination revealed an aortic murmur at the third intercostal space. Transthoracic  
8 echocardiography showed a BAV (Fig.3.H and movie S8) with a raphe between the right and  
9 the non-coronary leaflets (so called I, R/NC, regarding the Sievers classification) and a mild-  
10 to-moderate aortic regurgitation (Effective regurgitant orifice area = 16mm<sup>2</sup>) due to a prolapse  
11 of the anterior leaflet. Pedigree analysis showed that the proband's twin carried the same  
12 variant. However, ultrasound and examination revealed no congenital malformation in this  
13 individual. No other living relatives were positive for the variant or had cardiac complaints.  
14 The proband carrying the p.K2502R (c.7505A>G) variant was incidentally diagnosed at 13  
15 years old. Family medical history revealed that his mother had a mitral valve prolapse.  
16 However, we have no information on the mother' genotype. Physical examination revealed a  
17 3/6 holodiastolic murmur. Transthoracic echocardiography showed a BAV (Fig. 3.I; and movie  
18 S9) with a raphe between the right and the left coronary leaflets (I, R/L, regarding the Sievers  
19 classification) and a moderate aortic regurgitation (Effective regurgitant orifice area = 20mm<sup>2</sup>)  
20 due to a prolapse of the anterior leaflet. There was no dilatation of the ascending aorta. Left  
21 ventricular ejection fraction was 70%.

22 The proband (dbGaP Subject ID-711051) harboring the p.S217L (c. 650C>T) variant was  
23 diagnosed in adolescence (age 17.3 years old) by echocardiography with a BAV R/NC fusion.  
24 Further cardiac analysis revealed no other associated cardiac defects (cardiac situs, systemic  
25 vein, hepatic vein, pulmonary vein, right atrium, atrial septum, left atrium, atrioventricular

26 junction, tricuspid valve, mitral valve, right ventricle, left ventricle, pulmonary valve, coronary  
27 arteries, pulmonary arteries and aorta are normal). The proband is a caucasian male born in the  
28 United States of America, he stands at 162.2cm tall and weighs 117kg, he presented with no  
29 other extra cardiac abnormalities. His mother and father are caucasian Americans and were 22  
30 and 26 years of age respectively at the birth of the proband. The mother also harbors the same  
31 p.S217L variant. Although the mother has no reported history of heart disease, we have no  
32 information regarding whether or not she has undergone echocardiography to detect BAV (a  
33 limitation of the study recognized by the PCGC). No further information regarding the mother  
34 is available.

### 35 **Morpholinos**

36 The sequences of the injected MOs are the following:

37 Pz1b MO1: 5'-TCTGTTGCTGGATTCTGTGAATCAT-3'-5ng

38 Pz1b MO2: 5'-ACCCATGATGCTGCAACACACACAC-3'-4ng

39 *tnt2* MO : 5'-CATGTTTGCTCTGATCTGACACGCA3' -3ng

### 40 **DNA microinjection**

41 The *fli1ep:hPIEZO1* constructs were generated using the Tol2 kit<sup>1</sup>. 478 p5E*fli1ep* was a gift  
42 from Nathan Lawson (Addgene plasmid # 31160 ; <http://n2t.net/addgene:31160> ;  
43 RRID:Addgene\_31160). Wildtype variant *hPIEZO1* were subcloned from pIRES2-GFP into  
44 pME-MCS by restriction digestion and ligation. 5' capped sense RNAs were synthesized using  
45 a construct encoding the transposase and the mMessage mMachine kit (Ambion). 20 pg of the  
46 *Fli1ep:hPziezo1* DNA construct and 20 pg of the transposase sRNA were simultaneously  
47 injected into embryos at the one cell stage.

### 48 **Morpholino and CRISPR/Cas9 control experiments**

49 The Pz1b MO1 and MO2 were designed to block the post-transcriptional splicing of the Pz1b.  
50 As with Pz1b MO1 (Suppl.fig.S3.A,B), we also confirmed that splicing had been disrupted by



51 performing RT-PCR on Pz1b MO2 morphants (Suppl.fig.S3.I,J). To further ensure that the  
52 observed phenotype is due to specific knockdown of Pz1b, we co-injected suboptimal  
53 concentrations of both Pz1b MO1 and Pz1b MO2. Subsequent *in situ* hybridization with a  
54 *cmhc2a* probe reveals that injection of either morpholino at suboptimal concentrations alone  
55 does not affect heart development (Suppl.fig.S3.K-N). However, co-injection of both  
56 morpholinos at these concentrations results in the same defective cardiac looping phenotype  
57 observed at optimal concentrations of either morpholino (Suppl.fig.S3.O,P). Lastly, we also  
58 endeavoured to knockout (KO) Pz1b by employing a CRISPR/Cas9 strategy. To achieve this,  
59 we designed a gRNA which targeted exon 11 of Pz1b. In this manner we were able to generate  
60 a mutant zebrafish line harbouring a 13bp substitution at position 1435 to 1437 in Pz1b resulting  
61 in a frameshift and premature stop codon after 609 amino acids. This line was designated  
62 *piezo1b<sup>mmr5</sup>*. Unfortunately, homozygous *piezo1b<sup>mmr5/mmr5</sup>* embryos did not display any  
63 discernible phenotype. A recent report has indicated that KO of the other *piezo1* zebrafish  
64 paralogue *piezo1a* also does not produce any discernible phenotype<sup>2</sup>. Although it is possible  
65 that zebrafish do not require *piezo1* at all for development, based on the drastic consequences  
66 observed in mammals and humans when *piezo1* is KO or mutated, this seems unlikely<sup>3-5</sup>. We  
67 reasoned that the most likely explanation for the lack of phenotype was due to compensation,  
68 as has been reported in other zebrafish KO lines where the expected phenotype was not  
69 observed<sup>6</sup>. To assess this possibility we followed the recently developed morpholino  
70 guidelines<sup>7</sup> and injected the Pz1b morpholino into embryos from an incross of the  
71 *piezo1b<sup>mmr5/mmr5</sup>* line. If compensation has occurred, we should expect that the Pz1b morpholino  
72 would have little effect in homozygous *piezo1b<sup>mmr5/mmr5</sup>* embryos. Indeed, we were able to  
73 observe an obvious oedema and defective cardiac looping in wildtype Pz1b morphant embryos  
74 (the embryos were produced by incrossing a *piezo1b<sup>+/+</sup>* line which was established in parallel  
75 to the KO line to maintain the same genetic background), however this defect was absent in

76 *piezo1b<sup>mmr5/mmr5</sup>* morphants (Suppl.fig.S4.A,B). To analyse this difference in more detail, we  
77 performed a nitric oxide (NO) (DAF-FM-DA) assay to assess the production of this molecule  
78 in the OFT. Our analysis indicates that there is a significant decrease in the production of NO  
79 in the OFT in WT Pz1b morphant embryos compared to sibling WT controls (Adjusted P  
80 Value= <0.0001) (Suppl.fig.S4.C,D,G). However, there was no significant decrease in OFT NO  
81 production in *piezo1b<sup>mmr5/ mmr5</sup>* embryos injected with the Pz1b MO compared to sibling  
82 *piezo1b<sup>mmr5/mmr5</sup>* controls (Adjusted P Value= 0.0212) (Suppl.fig.S4.E,F,G). This indicates that  
83 in *piezo1b<sup>mmr5/mmr5</sup>* zebrafish embryos, Pz1b is compensated and thus the Pz1b morpholino has  
84 little effect. How it is compensated we are unable to tell at this juncture. This result also  
85 confirms that the phenotype we observe in Pz1b morphants is specific to knockdown of Pz1b  
86 and is not due to off target effects.

87

#### 88 **Zebrafish cardiac performance analysis**

89 The heart is at the centre of the circulatory system and consequently any reduction in its  
90 performance will have wide ranging consequences. Using the  $\mu$ ZebraLab™ system from  
91 ViewPoint<sup>8</sup>, we were able to determine that Pz1b morphant embryos had a significantly lower  
92 heart rate (160.4bpm +/-3.4SEM) than WT embryos (187.5bpm +/- 0.65SEM) (Suppl.fig.2.E).  
93 To investigate this phenotype further, we next analysed a number of blood flow parameters  
94 using the ViewPoint ZebraBlood™ system<sup>8</sup>. In this manner we were able to determine that the  
95 mean blood flow in Pz1b morphants was significantly lower than that of un-injected controls  
96 (Suppl.fig.2.F). Further analysis of Pz1b morphants indicates that the maximal blood flow  
97 (corresponding to cardiac systole) is also markedly reduced when compared to the control  
98 embryos (Suppl.fig.2.G). Similarly, the average stroke volume is also significantly lower in the  
99 Pz1b morphants when compared to un-injected controls (Suppl.fig.2.H). The reduced blood  
100 flow rate associated with systole could also be an indicator that cardiac contractility is

101 compromised in Pz1b morphants. To test this we made high-speed video recordings of either  
102 wildtype un-injected embryos or Pz1b morphants. Subsequent frame by frame analysis allowed  
103 us to measure the distance that the ventricular wall contracts during a cardiac cycle  
104 (Suppl.fig.6,B). In this manner, we found that ventricular contraction in Pz1b morphants was  
105 increased resulting in a reduced end systolic volume (ESV) (Suppl.fig.2.I). Furthermore, we  
106 were also able to observe blood regurgitation occurring between the atrium and ventricle at the  
107 end of systole (movies S1 and S2). Taken together, the decreased ESV and cardiac output  
108 observed in Pz1b morphants suggests the presence of OFT stenosis.

109

#### 110 **Zebrafish strains and husbandry.**

111 Zebrafish were maintained under standardized conditions and experiments were conducted in  
112 accordance with local approval (APAFIS#4054-2016021116464098 v5) and the European  
113 Communities council directive 2010/63/EU. Embryos were staged as described <sup>9</sup>. The  
114 *Tg(fli1a:GFP)y1Tg* was provided by the CMR[B] *Centro de Medicina Regenerativa de*  
115 *Barcelona*. The double transgenic line *Tg(fli1a:GFP)y1;Tg(cmlc2a:RFP)* was generated in  
116 house. All larvae were euthanised by administration of excess anaesthetic (Tricaine).

117

#### 118 **Morpholinos and injections**

119 Morpholino oligonucleotides (MOs) were obtained from Gene Tools (Philomath, OR, USA)  
120 and injected into one-cell stage embryos. The Pz1b MO1 and MO2 target the intron 7/exon 8  
121 and the last exon/intron splice site of *piezo1b* (GenBank: KT428876.1) respectively  
122 (supplemental information).

123

124

125

126 **Embryonic zebrafish endothelial primary cell culture.**

127 3dpf *Tg(fli1a:GFP)y1* embryos were placed in a microtube and pipetted up and down 10 times  
128 to remove the yolk sac. Digestion was performed in digestion buffer (2.5mg/mL trypsin, 1mM  
129 EDTA, 0.16mg/mL tricaine in PBS) in the incubator (28°C) and monitored every 10 minutes  
130 and pipetted up and down to dissociate cells mechanically. The reaction was stopped by adding  
131 a same volume of 10% FBS, 2mM CaCl<sub>2</sub>. Cells were pelleted by centrifugation 3 min 3000rpm,  
132 washed with culture medium (L-15, 5% FBS, 1% penicillin/streptavidin) and re-suspended in  
133 culture medium. Cells were plated in a 35mm Petri dish (5 embryos/2mL/per dish) and placed  
134 in an atmosphere of 95% air/5% CO<sub>2</sub> at 30 °C for a minimum 2 hours prior to patch clamp  
135 experiments.

136

137 **Cell surface quantification**

138 For membrane expression quantification of the WT and variant PIEZO1, fluorescence intensity  
139 (grey value) was measured across a line from the outside to the inside of the cell for GFP and  
140 RFP using ImageJ.

141

142 **PIEZO1 3D structure**

143 Residues K2528 (Magenta) and Y2038 (Green) identified in this study as subject to genetic  
144 variability are represented as spheres. Images were produced using PyMOL™ Molecular  
145 Graphics System, Version 1.8.6.0.

146

147 **CRISPR/Cas9**

148 Pz1b target sequences were identified using ZiFiT online software<sup>10</sup>. The Pz1b gRNA was  
149 synthesised from a DNA string template from Invitrogen using the Megashortscript T7 kit  
150 (Ambion) and purified by phenol/chloroform extraction. 150pg of Pz1b gRNA was co-injected

151 with nls-Cas9 protein (N.E.B). Embryos were bred to adulthood and initially screened for  
152 mutations in *Pz1b* using a previously described T7 assay <sup>11</sup>. The founder of the *piezo1b<sup>mmr5</sup>*  
153 mutant line was verified by Sanger sequencing and outcrossed to AB wildtype. F1 *piezo1b<sup>mmr5/+</sup>*  
154 adults were identified using the T7 assay and verified by Sanger sequencing.

155

#### 156 **BDM, PHZ and GsMTx4 treatment**

157 BDM (10 or 15mM, Sigma-B0733), PHZ (0.1mg/mL, Sigma-114715) and GsMTx4 (1μM,  
158 Smartox Biotechnology) were added to the embryo medium 2 hours, 2 days and 4 hours before  
159 analysis respectively.

160

#### 161 **TRIM, PKI166 and AG478 treatments**

162 For the ISH analysis the NO inhibitor TRIM (0.25 mM, Sigma-T7313) was added to the embryo  
163 medium at 48hpf. PKI166 AND AG1478 treatments were performed as described <sup>12</sup>. For the  
164 aortic valves analysis, TRIM (0,01mM) was added to the embryo medium at 24hpf and  
165 refreshed daily until 7dpf.

#### 166 **Electrophysiology**

167 Each current was evaluated using an Axiopatch 200B amplifier (Axon Instrument, USA), low-  
168 pass filtered at 3kHz and digitized at 2kHz using a 12-bit analog-to-digital digidata converter  
169 (1440A series, Axon CNS, Molecular devices, USA). Results are expressed as mean ± standard  
170 error of the mean (SEM). Patch clamp pipettes were pulled using vertical puller (PC-10,  
171 Narishige) from borosilicate glass capillaries and had a resistance 1.2-2MΩ for the inside out  
172 currents. For the whole cell attached currents, the bath solution contained (in mM) 155 KCl, 3  
173 MgCl<sub>2</sub>, 5 EGTA and 10 HEPES adjusted to pH7.2 with KOH. The pipette solution contained  
174 (in mM) 150 NaCl, 5 KCl, 2 CaCl<sub>2</sub>, and 10 HEPES adjusted to pH7.4 with NaOH.

175 ***In situ* hybridisation**

176 The *Pz1b* probe was generated by cloning a 2kb fragment from a 3dpf zebrafish cDNA library  
177 into pGEMT. The *cmlc2a* probe was generated from pBSK *cmlc2a* containing the full length  
178 *cmlc2a* gene. The *elnb* probe was generated by cloning a 1kb fragment from a 3dpf zebrafish  
179 cDNA library into pGEMT. The *acana* probe was generated as described previously. ISH on  
180 larvae were performed as described previously<sup>13</sup>. Anti-sense probes were synthesized as  
181 described previously<sup>14</sup>. High-resolution fluorescent double whole-mount *in situ* hybridization  
182 were performed as described previously<sup>15</sup>.

183

184 **DAF labelling**

185 To reveal the presence of NO, embryos were incubated in E3 medium containing 5µM DAF-  
186 FM DA (Life Technologies, D23842), for 1 hour in the dark at 28°C. Fluorescence intensities  
187 of the OFT were measured using ImageJ software.

188

189 **Immunohistochemistry**

190 Transfected cells were fixed in 4% PFA for 20min and blocked with PBS, 2mg/mL BSA, 2%  
191 lamb serum for 45min at room temperature. Cells were then incubated in the same solution  
192 with primary rabbit anti-Piezo1 antibody (Proteintech 15939-1-AP, 1/100) for 3h followed by  
193 donkey Alexa Fluor 594-anti rabbit (Jackson ImmunoResearch Laboratories, 1/200) 2h at room  
194 temperature.

195

196 **RT-PCR analysis**

197 30hpf embryos non-injected or injected with 5ng of *piezo1b* MO1 or with 5 or 10ng of *piezo1b*  
198 MO2 were collected and RNA was isolated with TRIzol® Reagent. RT-PCR was performed

199 on 1µg of RNA using oligo-dT primers and amplification PCR was performed using *piezolb*  
200 specific primers

201 The sequences of the Pz1b specific primers are the following:

202 For (MO1): 5'-GTTTTGATCGTAACGTCAA-3'

203 Rev (MO1): 5'-TCAGTTGTTTGTGTCTCTTT-3'

204 For (MO2): 5'-ACGGAGTCTATAAGAGCATC-3'

205 Rev (MO2): 5'-TCATTTGTTTTCTCTCGCG-3'

206

### 207 **Cardiovascular parameters analysis**

208 To determine the cardiovascular parameters, we utilized µZebraLab™ software from  
209 ViewPoint which has been developed specifically for this purpose. All experiments were  
210 performed as described previously<sup>8</sup>. To determine the mean blood flow, the average of the  
211 blood flow values was calculated from a 10 second time frame (1,300 frames). For the  
212 maximum and minimum blood flow, averages of highest and lowest peak values were  
213 calculated during 20 heartbeats. Stroke volume was calculated by dividing the average blood  
214 flow (nL/sec) by the heart beat per second (BPM/60). To assess the heart contractility, movies  
215 were recorded at 120fps and measurements were made using ImageJ software.

216

### 217 **Confocal Imaging**

218 Still images of fixed or anesthetized embryos were recorded using a ProgRes CF colour camera  
219 (Jenoptik) mounted on a SZX16 stereomicroscope (Olympus). Fluorescent embryonic heart  
220 images were acquired with a Leica TCS SP8 inverted confocal laser scanning microscope with  
221 a 20X or 40X oil immersion objectives. Maximal projections and analysis were performed with  
222 Imaris or ImageJ softwares. OFT movements were recorded using a high speed 12kHz resonant

223 scanner. Image acquisition and image analysis were performed on workstations of the  
224 Montpellier RIO Imaging facility of the Arnaud de Villeneuve/IFR3 campus.

225

## 226 **PCGC data analysis**

227 Whole exomic data for individual probands was downloaded from the NIH/dbGaP repository  
228 (The Pediatric Cardiac Genomics Consortium (PCGC)). The data was subsequently converted  
229 into the Fastq format using the SRA toolkit provided by NIH/dbGaP. The exomic data was  
230 aligned to the human reference genome and SNPs associated with *PIEZO1* were identified  
231 using the Integrative Genomics Viewer<sup>16</sup>. Patients' data analysis was approved by the INSERM  
232 Institutional Review Board (IRB00003888 – Opinion number 15-221).

233

## 234 **References**

- 235 1. Kwan, K.M. *et al.* The Tol2kit: a multisite gateway-based construction kit for Tol2 transposon  
236 transgenesis constructs. *Dev Dyn* **236**, 3088-99 (2007).
- 237 2. Shmukler, B.E. *et al.* Homozygous knockout of the piezo1 gene in the zebrafish is not  
238 associated with anemia. *Haematologica* (2015).
- 239 3. Ranade, S.S. *et al.* Piezo1, a mechanically activated ion channel, is required for vascular  
240 development in mice. *Proc Natl Acad Sci U S A* **111**, 10347-52 (2014).
- 241 4. Lukacs, V. *et al.* Impaired PIEZO1 function in patients with a novel autosomal recessive  
242 congenital lymphatic dysplasia. *Nat Commun* **6**, 8329 (2015).
- 243 5. Fotiou, E. *et al.* Novel mutations in PIEZO1 cause an autosomal recessive generalized  
244 lymphatic dysplasia with non-immune hydrops fetalis. *Nat Commun* **6**, 8085 (2015).
- 245 6. Rossi, A. *et al.* Genetic compensation induced by deleterious mutations but not gene  
246 knockdowns. *Nature* **524**, 230-3 (2015).
- 247 7. Stainier, D.Y.R. *et al.* Guidelines for morpholino use in zebrafish. *PLoS Genet* **13**, e1007000  
248 (2017).
- 249 8. Parker, T. *et al.* A multi-endpoint in vivo larval zebrafish (*Danio rerio*) model for the  
250 assessment of integrated cardiovascular function. *J Pharmacol Toxicol Methods* **69**, 30-8  
251 (2014).
- 252 9. Kimmel, C.B., Ballard, W.W., Kimmel, S.R., Ullmann, B. & Schilling, T.F. Stages of embryonic  
253 development of the zebrafish. *Dev Dyn* **203**, 253-310 (1995).
- 254 10. Sander, J.D., Zaback, P., Joung, J.K., Voytas, D.F. & Dobbs, D. Zinc Finger Targeter (ZiFIT): an  
255 engineered zinc finger/target site design tool. *Nucleic Acids Res* **35**, W599-605 (2007).
- 256 11. Jao, L.E., Wente, S.R. & Chen, W. Efficient multiplex biallelic zebrafish genome editing using a  
257 CRISPR nuclease system. *Proc Natl Acad Sci U S A* **110**, 13904-9 (2013).
- 258 12. Goishi, K. *et al.* Inhibition of zebrafish epidermal growth factor receptor activity results in  
259 cardiovascular defects. *Mech Dev* **120**, 811-22 (2003).



- 260 13. Rambeau, P. *et al.* Reduced aggrecan expression affects cardiac outflow tract development in  
261 zebrafish and is associated with bicuspid aortic valve disease in humans. *Int J Cardiol* **249**,  
262 340-343 (2017).  
263 14. Thisse, C., Thisse, B., Schilling, T.F. & Postlethwait, J.H. Structure of the zebrafish *snail1* gene  
264 and its expression in wild-type, spadetail and no tail mutant embryos. *Development* **119**,  
265 1203-15 (1993).  
266 15. Brend, T. & Holley, S.A. Zebrafish whole mount high-resolution double fluorescent in situ  
267 hybridization. *J Vis Exp* (2009).  
268 16. Robinson, J.T. *et al.* Integrative genomics viewer. *Nat Biotechnol* **29**, 24-6 (2011).

269

## 270 **Supplemental figure legends**

271

### 272 **Figure S1. Pz1b is expressed in endothelial cells.**

273 (A-C) ISH using an antisense Pz1b probe. (A,B) Pz1b expression can be detected in the heart  
274 of zebrafish embryos (black arrowhead) at 24hpf (A), 48hpf (B). (C) Pz1b is also expressed in  
275 the developing vasculature present on the yolk sac (black arrowhead) and in the tail (white  
276 arrowhead) of 4dpf zebrafish embryos. Scale bars: (A-C) 100µm

277

### 278 **Figure S2. *Piezo1b* is involved in cardiovascular development.**

279 (A) Un-injected 72hpf zebrafish embryo, (A') the same embryo at higher magnification. (C)  
280 Pz1b MO 72hpf morphant displaying pericardial oedema and defective cardiac looping (black  
281 arrowhead), (C') the same embryo at higher magnification. (n=48/50). (B,B',D,D') ISH using  
282 an antisense *cmhc2a* probe on (B) 72hpf un-injected zebrafish embryos, (B') the same embryo  
283 at higher magnification, the yellow dashed line above the ventricle (v) and atrium (a) is an  
284 indicator for the degree of cardiac looping. (D) 72hpf Pz1b MO morphant embryo, (D') the  
285 same embryo at higher magnification, note the yellow dashed line is no longer horizontal  
286 indicating a defect in cardiac looping (n=48/50). (E) Graph depicting the average heart rate in  
287 beats per minute (BPM) of WT (n=8) and Pz1b morphants (n=8). (F) Graph depicting the  
288 average blood flow rate in nano litres per second (nL/sec) of WT (n=8) and Pz1b morphants  
289 (n=8). (G) Graph depicting the average minimum/maximum blood flow rate in nano litres per

290 second (nL/sec) of WT (n=8) and Pz1b morphants (n=8). **(H)** Graph depicting the average  
291 stroke volume in nano litres per heart beat (nL/beat) of WT (n=8) and Pz1b morphants (n=8).  
292 **(I)** Graph depicting the average ventricular contractile distance in micro metres ( $\mu\text{M}$ ) of WT  
293 (n=5) and Pz1b morphants (n=5). **(J-M)** Maximal projections of 48hpf **(J,K)** and 72hpf **(L-M)**  
294 *Tg(fli1a:GFP)y1;Tg(cmlc2:RFP)* OFT from WT **(J,L)** and Pz1b morphants **(K,M)**. Yellow  
295 dashed lines delineate the OFT position at 48hpf **(J,K)**. **(N,O)** Maximal projections of a 72hpf  
296 *Tg(fli1a:GFP)y1* OFT from WT **(N)** and Pz1b morphants **(O)**. The white line indicates the  
297 width of the OFT immediately adjacent to the myocardium. **(P)** Graph showing the average size  
298 of the OFT of WT and Pz1b MO1 injected embryos (n wt=7, n Pz1bMO1=11). **(Q,R)**  
299 Resonance laser z-stack imaging of a 48hpf *Tg(fli1a:GFP)y1* OFT at 250ms interval, the yellow  
300 dashed lines delineate the inside of the OFT. The white double headed arrow indicates the OFT  
301 inside diameter during systole **(Q)**. **(S)** Graph showing the difference between OFT and aorta  
302 inside diameters between diastole and systole (n=4; 3 contractions for each). All graphs (\*  
303  $p<0,05$ , \*\*  $p<0.01$ , student's t-test), Scale bars **(A-B')**  $100\mu\text{m}$  **(J-O and Q,R)**  $10\mu\text{m}$ .

304

### 305 **Figure S3. Pz1b experimental controls.**

306 **(A,B)** RT-PCR analysis of Pz1b MO1 splice morphant embryos. The Pz1b MO1 targets the  
307 intron 7/exon 8 splice site. Primers designed against exons 7 and 8 (arrows in **(A)**) are able to  
308 amplify the correct 330bp fragment (lower band in **(B)**) from WT embryo cDNA (lane 3). With  
309 morphant embryo cDNA, the final intron has not been spliced out (lane 4) indicating *piezo1b*  
310 has been disrupted. The first two lanes correspond to the negative control without reverse  
311 transcriptase (RT). **(C-F)** Mouse *Piezo1* RNA can rescue the Pz1b morphant phenotype.  
312 Representative images of the severity of cardiac oedema: **(C)** no oedema, **(D)** moderate oedema,  
313 **(E)** severe oedema. **(F)** Graph indicating the percentage of embryos displaying either no  
314 oedema (white), moderate (grey) or severe (black) in either Pz1b morphant embryos (Pz1b MO)

315 or Pz1b morphants co-injected with 20pg of mPz1 RNA (Pz1b MO+Pz1 RNA) n= the  
316 cumulative number of embryos from 5 separate experiments. **(G)** Brightfield image of an un-  
317 injected 3dpf *Tg(cmlc2a:GFP)* zebrafish embryo, **(G')** fluorescent image of the same embryo,  
318 GFP can be detected in the heart (green). **(H)** Brightfield image of an Pz1b MO2 injected 3dpf  
319 *Tg(cmlc2a:GFP)* zebrafish embryo, **(H')** Fluorescent image of the same embryo, GFP can be  
320 detected in the heart (green), note the linear appearance of the chambers (n=38/40). **(I,J)** RT-  
321 PCR analysis of Pz1b MO2 morphant embryos. The Pz1b MO2 targets the last intron/exon  
322 splice site **(I)**. Primers designed against the final two exons (arrows in **(I)**) are able to amplify  
323 the correct 440bp fragment (lower band) from wildtype embryo cDNA (lane 1). **(J)** With  
324 morphant embryo cDNA, the final intron has not been spliced out (upper 2,183bp band in lanes  
325 2 and 3) indicating *piezo1b* has been disrupted. **(K)** Brightfield image of a 3dpf embryo injected  
326 with suboptimal (4ng) concentration of Pz1b MO1. **(L)** *In situ* hybridization using an antisense  
327 *cmlc2a* probe indicates heart looping is normal (n=20/20). **(M)** Brightfield image of a 3dpf  
328 embryo injected with suboptimal (3ng) concentration of Pz1b MO2. **(N)** *In situ* hybridization  
329 using an antisense *cmlc2a* probe indicates heart looping is normal (n=20/20). **(O)** Brightfield  
330 image of a 3dpf embryo injected with suboptimal concentration of Pz1b MO1 (4ng) and Pz1b  
331 MO2 (3ng). **(P)** *In situ* hybridization using an antisense *cmlc2a* probe indicates heart looping  
332 is disrupted (n=20/22). **(Q-R)** Mouse *Piezo1* RNA can rescue the Pz1b morphant OFT  
333 phenotype. Representative images of the OFT in WT larvae (wt), Pz1b morphants (Pz1b MO)  
334 and Pz1b morphants co-injected with mPz1 RNA (Pz1bMO+mRNA). The white line indicates  
335 where the width of the OFT was measured. **(R)** Graph indicating the average width of the OFT  
336 in WT (n=10), Pz1b morphants (n=10) and Pz1b morphants co-injected with mPiezo1 mRNA  
337 (n=12) (\* p<0,05, \*\* p<0.01, student's t-test). Scale bars **(G,G',K,L)** 100µm.

338

339

340

341

342

343 **Figure S4. Homozygous *piezo1b<sup>mmr5/mmr5</sup>* knockout zebrafish larvae are compensated.**

344 (A) Brightfield image of a 3dpf *piezo1b<sup>mmr5/mmr5</sup>* zebrafish embryo injected with Pz1b MO. (B)

345 Brightfield image of a 3dpf *piezo1b<sup>+/+</sup>* zebrafish embryo injected with Pz1b MO (black arrow

346 head indicates cardiac oedema). (C) A 3dpf *piezo1b<sup>+/+</sup>* zebrafish embryo treated with DAF-FM

347 DA to reveal NO production in the OFT (white arrow head indicates the OFT). (D) A 3dpf

348 *piezo1b<sup>+/+</sup>* zebrafish embryo injected with Pz1b MO and treated with DAF-FM DA to reveal

349 NO production in the OFT (white arrow head indicates the OFT). (E) A 3dpf *piezo1b<sup>mmr5/mmr5</sup>*

350 zebrafish embryo treated with DAF-FM DA to reveal NO production in the OFT (white arrow

351 head indicates the OFT). (F) A 3dpf *piezo1b<sup>mmr5/mmr5</sup>* zebrafish embryo injected with Pz1b MO

352 and treated with DAF-FM DA to reveal NO production in the OFT (white arrow head indicates

353 the OFT). (G) Graph showing mean grey intensity values (WT control n=48, WT Pz1b MO

354 n=51, KO control n=35, KO Pz1b MO n=39). Error bars indicate SEM, ANOVA and Sidak's

355 multiple comparisons test \*\*\*\*P<0.0001.

356

357 **Figure S5. *Piezo1b* regulates nitric oxide production and extracellular matrix composition**

358 **in the outflow tract.**

359 (A) WT 72hpf zebrafish embryo treated with DAF-FM DA to reveal NO production in the OFT

360 (bisected by upper dashed white line). Dashed white lines indicate the regions where grey scale

361 intensity was measured, the upper line bisects the OFT and the lower line is used to measure

362 the background intensity. (B) Higher magnification image of the OFT of an un-injected embryo

363 assayed with DAF-FM DA, (B') graph showing the grey scale intensity across the OFT. (C-

364 G') OFT images and grey scale graphs of a 72hpf Pz1b morphant (C,C'), PHZ treated embryo

365 **(D,D')**, 10mM BDM treated embryo **(E,E')**, 15mM BDM treated embryo **(F,F')**, *tnnt2*  
366 morphant **(G,G')** or a GsMTx4 treated embryo **(H,H')**. **(I)** Graph showing the average grey  
367 scale intensity of un-injected controls (wt), Pz1b morphants (Pz1b MO), PHZ treated embryos  
368 (PHZ), embryos treated with 10mM BDM (BDM 10mM), embryos treated with 15mM BDM  
369 (BDM 15mM), *tnnt2* morphant or GsMTx4 treated embryos (GsMTx4) (n=10 for each  
370 condition). **(J-L)** Single z-stack confocal images of the OFT following an immunostaining  
371 using an anti-ElnB antibody **(J, red)** on 3 dpf *Tg(fli1a:GFP)y1* embryos **(H, green)**. The merged  
372 image **(L)** indicates that the cells producing ElnB are not endothelial which produce GFP. **(M-**  
373 **P)** *In situ* hybridization against *elnB* in 3 dpf WT, *tnnt2*, Pz1b morphants and TRIM treated  
374 larvae. **(Q,R)** *In situ* hybridization against *acana* in 3 dpf WT, and Pz1b morphants. Scale bars  
375 **(A)** and **(M-R)** 100 $\mu$ m; **(B)** 20 $\mu$ m; **(J-L)** 10 $\mu$ m. All graphs show mean values. Error bars  
376 indicate SEM, ANOVA and Dunnet's multiple comparisons test \*\*P<0.01(upper line, all  
377 samples), student's unpaired homoscedastic two tailed t-test \*\*P<0.01 (lower line Pz1b vs  
378 PHZ).

379

### 380 **Figure S6. Pz1b knockdown perturbs systolic contraction.**

381 **(A,B)** Representative images of contraction analysis using ImageJ software. The distance  
382 between the two ventricular walls is first measured at the end of diastole (yellow double headed  
383 arrow)**(A)**, **(B)** the distance is again measured at the end of systole (white double headed arrow,  
384 the difference is indicated by the black double headed arrow).

385

### 386 **Figure S7. Model of Pz1b signalling pathway.**

387 A cartoon schematic depicting the authors proposed signalling cascade. Hemodynamic forces  
388 in the OFT cause Piezo1 to open releasing cation into the endothelial cells cytoplasm. This  
389 induces an as of yet unidentified process to activate NOS resulting in the release of NO. This

390 in turn induces the cells which ensheath the OFT to begin producing ECM components such  
391 as Elastin and Aggrecan.

392

393

394 **Movie S1. The beating heart of a 3dpf wildtype embryo.**

395 High speed video recording capturing the beating heart of a 3dpf wildtype embryo. 5 heart beats  
396 are shown at 120fps then the same 5 heart beats are shown at 40fps. Blood can be seen entering  
397 the atrium and passing to the ventricle before ejection.

398

399 **Movie S2. The beating heart of a 3dpf Pz1b morphant.**

400 High speed video recording capturing the beating heart of a Pz1b morphant. 5 heart beats are  
401 shown at 120fps then the same 5 heart beats are shown at 40fps. Following the contraction of  
402 the ventricle blood can be seen regurgitating back into the atrium.

403

404 **Movie S3. OFT dynamism of a 48hpf *Tg(fli1a:GFP)y1* embryo.**

405 Resonance laser imaging capturing the dynamic movement of the OFT during systole and  
406 diastole. Frames were acquired every 50ms.

407

408 **Movie S4. Dorsal aorta dynamism of a 48hpf *Tg(fli1a:GFP)y1* embryo.**

409 Resonance laser imaging capturing the dynamic movement of the dorsal aorta during systole  
410 and diastole. Frames were acquired every 130ms.

411

412

413

414 **Movie S5. Aortic valves in a 7dpf wildtype zebrafish larvae.**

415 2 photon imaging of a BODIPY labelled 7dpf zebrafish larvae reveals the valves dynamically  
416 moving during the cardiac cycle.

417

418

419 **Movie S6. Aortic valves in a 7dpf Pz1b morphant zebrafish larvae.**

420 2 photon imaging of a BODIPY labelled 7dpf Pz1b morphant zebrafish larvae reveals the valves  
421 dynamically moving during the cardiac cycle.

422

423 **Movie S7. Aortic valves in a 7dpf *notch1b* mutant zebrafish larvae**

424 2 photon imaging of a BODIPY labelled 7dpf *notch1b* mutant zebrafish larvae reveals the  
425 valves dynamically moving during the cardiac cycle.

426

427 **Movie S8. Echocardiogram of the aortic valve from the Y2022H proband.**

428

429 **Movie S9. Echocardiogram of the aortic valve from the K2502R proband.**

430

|        |              | Exon number | Size coding exons | Patient number | Mean depth | SD Depth | Coverage 1X | Coverage 5X | Coverage 10X |
|--------|--------------|-------------|-------------------|----------------|------------|----------|-------------|-------------|--------------|
| PIEZO1 | NM_001142864 | 51          | 7566              | P58            | 67.33      | 54.62    | 99.47       | 95.72       | 92.16        |
|        |              |             |                   | P30            | 77.17      | 63.62    | 99.58       | 98.11       | 94.09        |



| Coverage 20X | Coverage 30X |
|--------------|--------------|
| 82.9         | 72.55        |
| 85.8         | 75.95        |

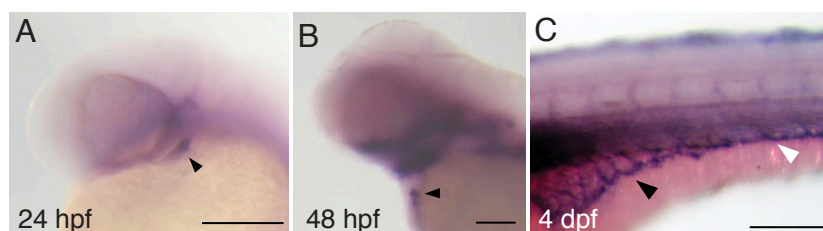

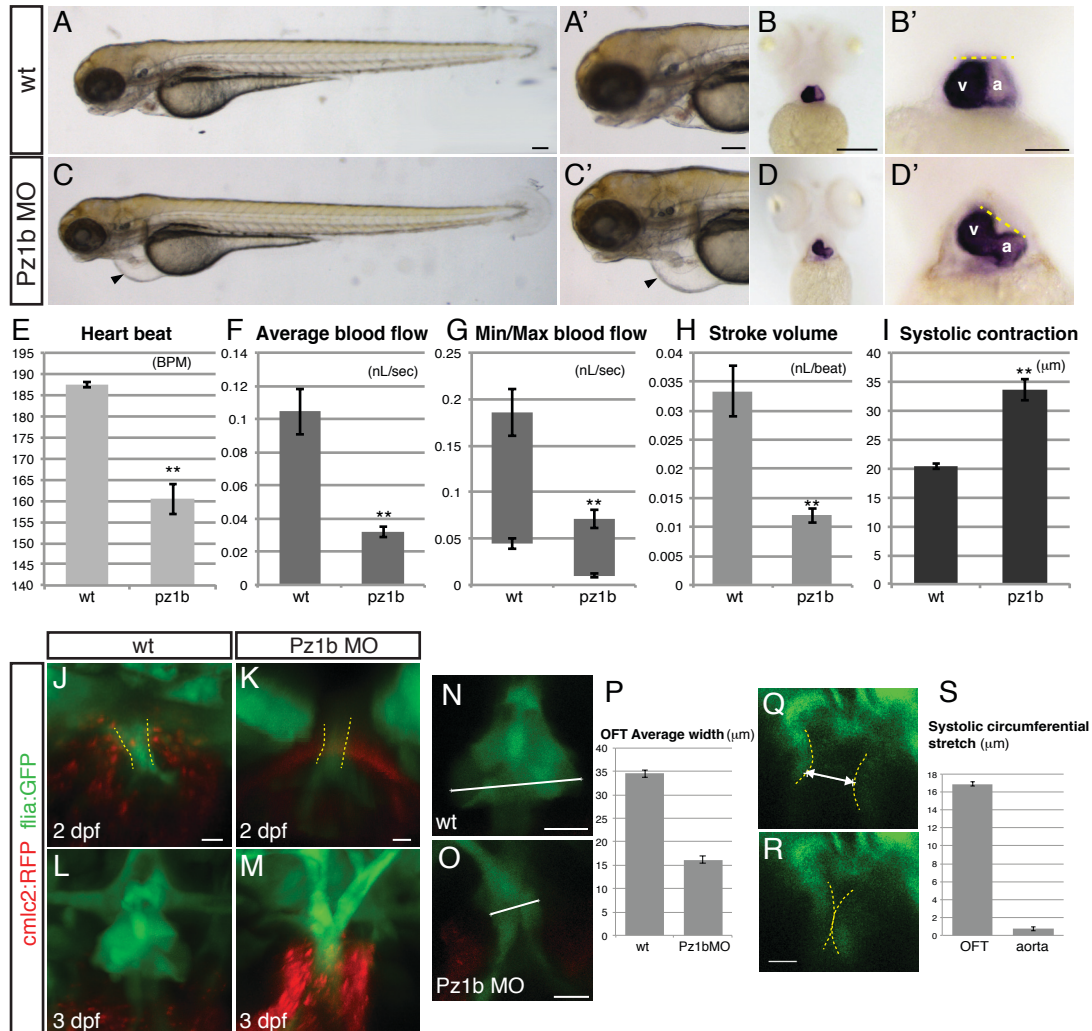

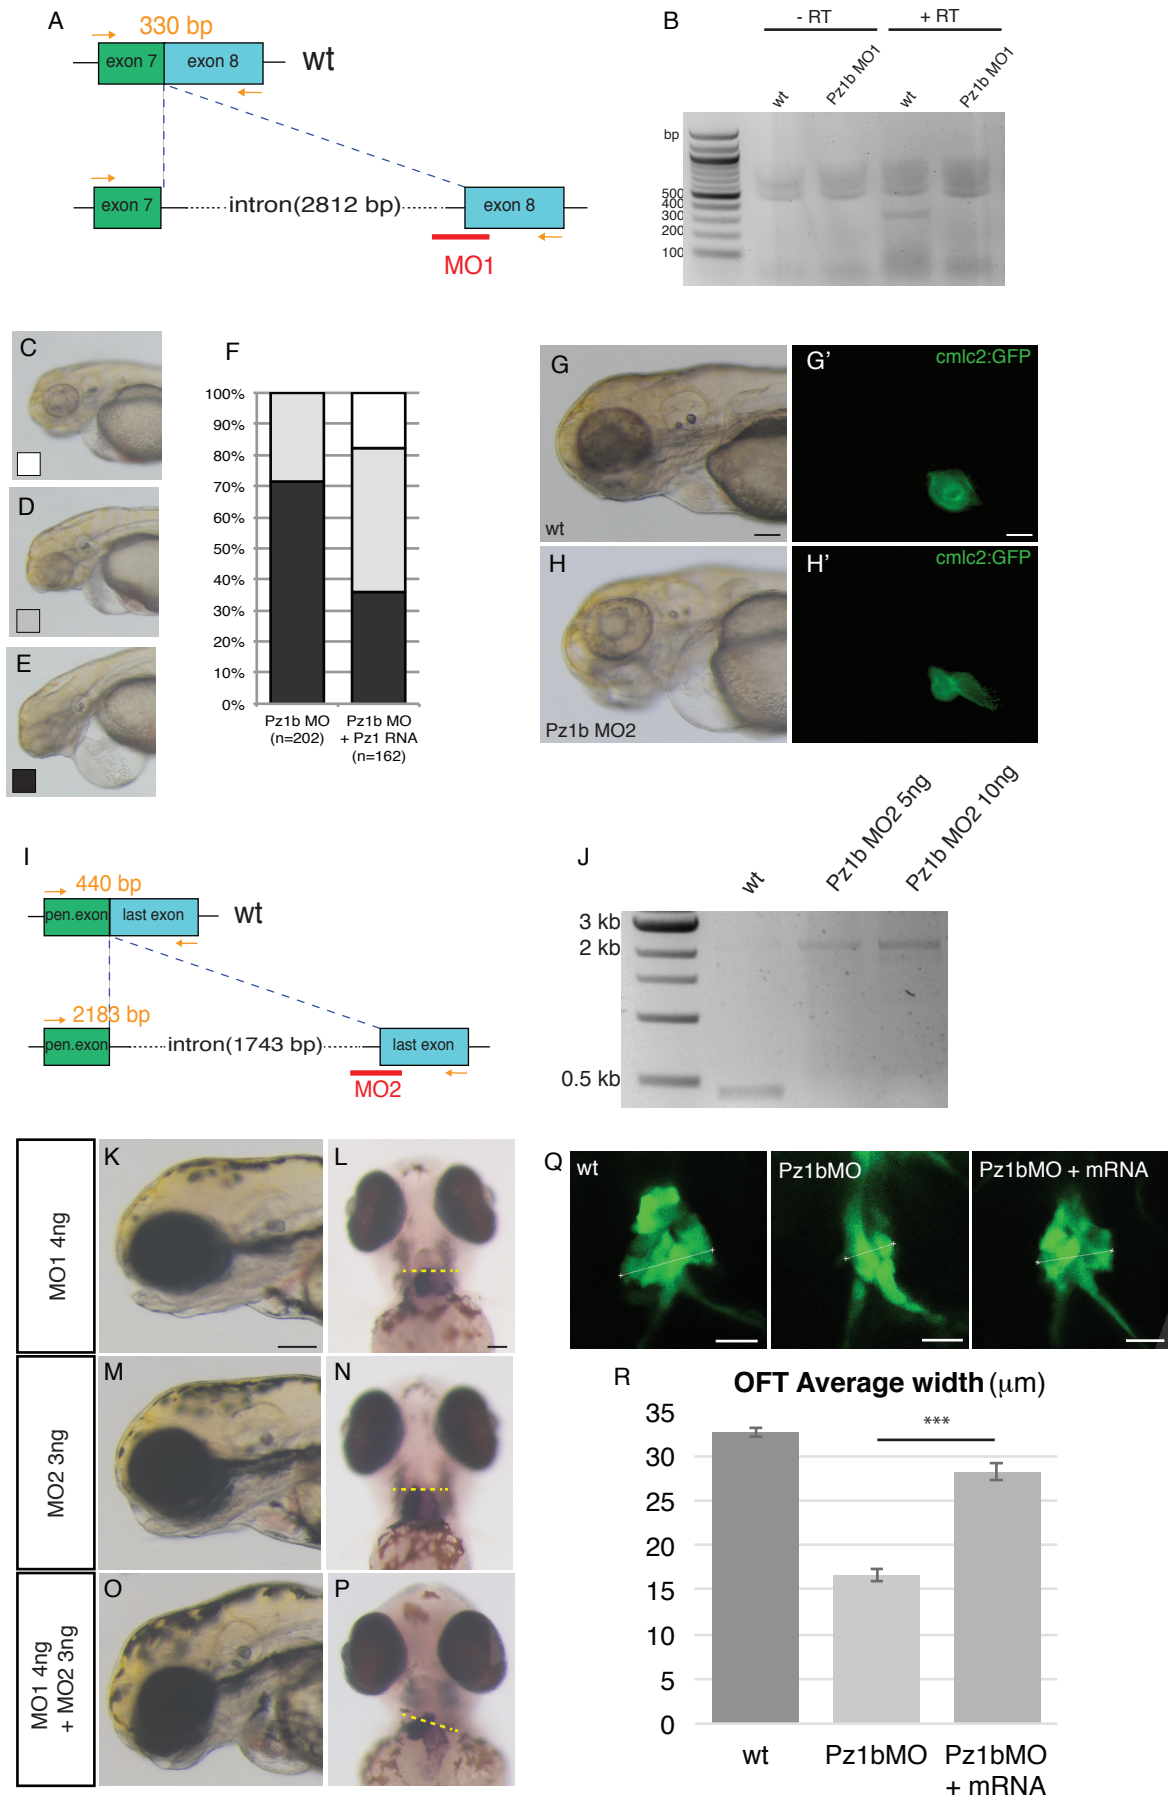

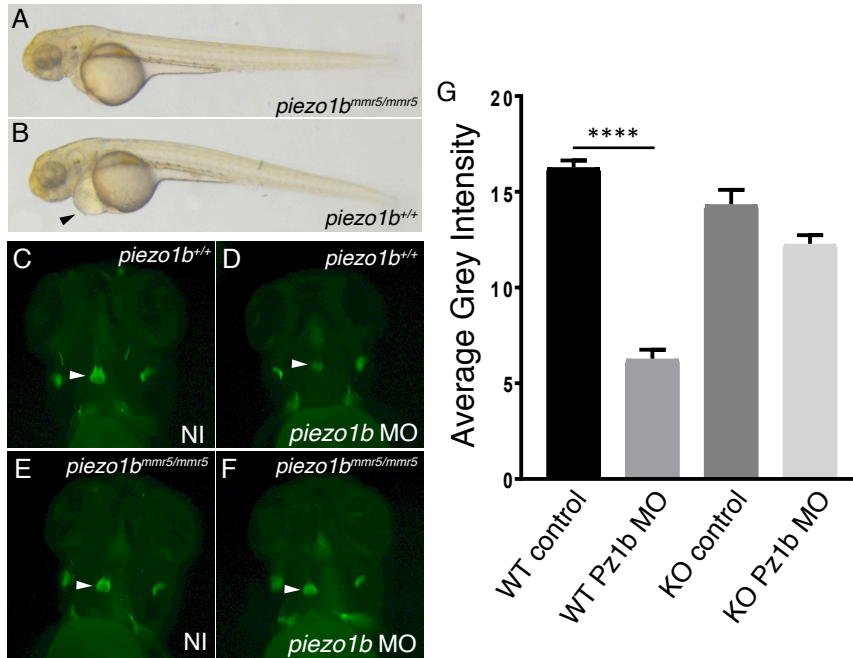

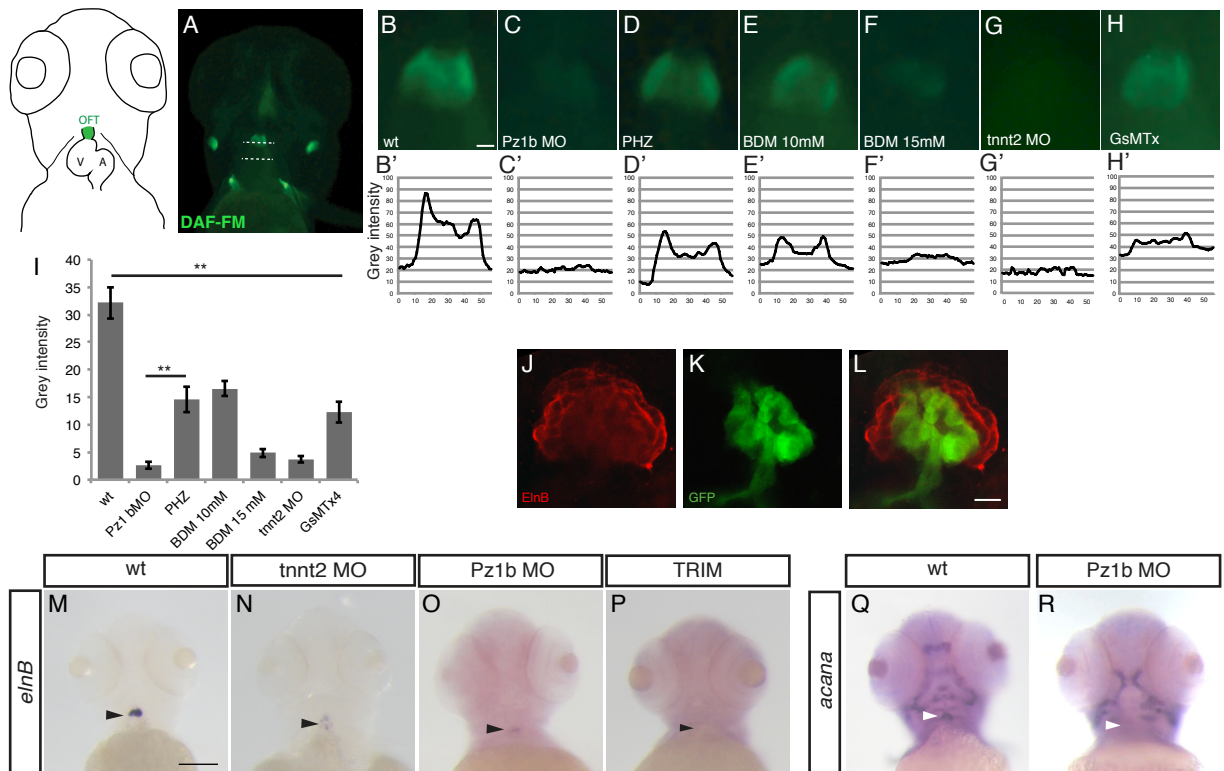

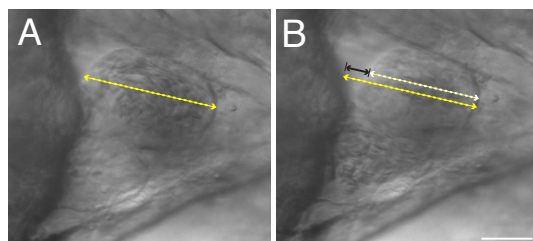

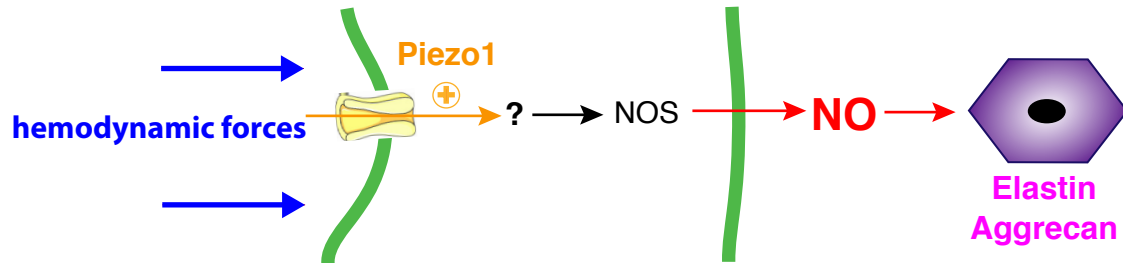

Source: https://www.biorxiv.org/content/10.1101/528588v1.full.pdf
